# Supplementary material
Source: publisher figshare collection journal article supplement (https://acs.figshare.com/ndownloader/files/3884653)
Supplement: Supplementary file 1 [file 3884653]

# **A One-Pot Diastereoselective Self Assembly of C-Stereogenic Copper(I) Diphosphine Clusters**

**Xiang-Yuan Yang,<sup>[a]</sup> Yongxin Li,<sup>[a]</sup> and Sumod A. Pullarkat\*<sup>[a]</sup>**

<sup>[a]</sup> Division of Chemistry & Biological Chemistry, School of Physical and Mathematical Sciences, Nanyang Technological University, Singapore 637616, Singapore Fax: (+65) 6791 1961; e-mail: sumod@ntu.edu.sg

## **Electronic Supporting Information**

|                                                                     |              |
|---------------------------------------------------------------------|--------------|
| <b><u>Table of Contents</u></b>                                     | <b>1</b>     |
| <b>General Information</b>                                          | <b>2</b>     |
| <b>Experimental Section</b>                                         | <b>2-4</b>   |
| <b>Reference</b>                                                    | <b>4</b>     |
| <b>NMR Spectra</b>                                                  | <b>5-13</b>  |
| <b>HPLC Spectra</b>                                                 | <b>14-18</b> |
| <b>NMR Spectra of Product formed between Diphosphine 5a and CuI</b> | <b>19</b>    |
| <b>Determination of <i>ee</i> and <i>de</i> for Ligand 6</b>        | <b>20</b>    |
| <b>X-Ray Structures of Clusters 7a-e</b>                            | <b>21-25</b> |
| <b>Crystallographic Data</b>                                        | <b>26-31</b> |

## General Information

All reactions were carried out under a positive pressure of nitrogen using standard Schlenk technique. Solvents were purchased from their respective companies and used as supplied. Where necessary, solvents were degassed prior to use. A Low Temp Pairstirrer PSL-1800 was used for controlling low temperature reactions. Column chromatography was done on Silica gel 60 (Merck). Melting points were measured using SRS Optimelt Automated Point System SRS MPA100. Optical rotation were measured with JASCO P-1030 Polarimeter in the specified solvent in a 0.1 dm cell at 22.0°C. NMR spectra were recorded on Bruker AV 300, AV 400 and AV 500 spectrometers. Chemical shifts were reported in ppm and referenced to an internal SiMe<sub>4</sub> standard (0 ppm) for <sup>1</sup>H NMR, chloroform-d (77.23 ppm) for <sup>13</sup>C NMR, and an external 85% H<sub>3</sub>PO<sub>4</sub> for <sup>31</sup>P{<sup>1</sup>H} NMR. All X-ray quality crystals were obtained *via* recrystallization from a dichloromethane solution layered with *n*-hexanes.

The palladacycle (*S*)-**8**<sup>[1]</sup> was prepared according to literature methods. All other reactants and reagents were used as supplied.

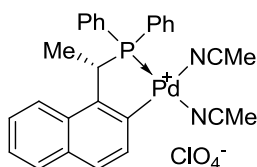

(*S*)-**8**

**Caution!** Perchlorate salts of metal complexes are potentially explosive compounds and should be handled with care.

## Preparation of Copper(I) Clusters **7a-c**

To a solution of Ph<sub>2</sub>PH (2.2 equiv) in toluene (10 mL) was added catalyst (*R*)- or (*S*)-**8** (6 mol %) and stirred for 10 minutes before cooling to -80°C. Diunsaturated alkene (1.0 equiv) was added followed by NEt<sub>3</sub> (2.0 equiv) in toluene (1 mL) dropwise. The solution was stirred at -80°C and the completion of the reaction was monitored by the disappearance of the phosphorous signal attributed to diphenylphosphine (-40 ppm) in the <sup>31</sup>P{<sup>1</sup>H} NMR spectrum. Upon completion, the solution was allowed to room temperature. Volatiles were removed under reduced pressure. The crude product was redissolved in acetone (10 mL) and CuCl (2.0 equiv) was added. The mixture was refluxed overnight and on cooling, concentrated to give the crude complex, which was purified *via* silica gel column chromatography (DCM or 9 DCM : 1 EA) to afford white solid of the clusters **7a-c**.

### **7a**

The hydrophosphination step was completed in 8 h. (72% yield based on Cu atoms). [ $\alpha$ ]<sub>D</sub> = -48.6 (*c* 0.1, DCM). Mp: 206-208°C. <sup>31</sup>P{<sup>1</sup>H} NMR (CDCl<sub>3</sub>, 202 MHz):  $\delta$  -1.2; <sup>1</sup>H NMR (CDCl<sub>3</sub>, 500 MHz):  $\delta$  9.03 (brs, 1H, Ar), 8.19-8.17 (m, 4H, Ar), 8.02-8.00 (m, 4H, Ar), 7.67-7.36 (m, 16H, Ar), 6.94-6.76 (m, 9H, Ar), 4.73-4.69 (m, 2H, PCHCHH), 4.59-4.54 (m, 2H, PCHCHH), 3.31 (dd, 2H, *J* = 18.1 Hz, 12.8 Hz, PCHCHH); <sup>13</sup>C NMR (CDCl<sub>3</sub>, 100 MHz):  $\delta$  197.8 (d, 2C, <sup>3</sup>*J*<sub>PC</sub> = 14.9 Hz, C=O), 140.1-128.0 (42C, Ar), 44.0 (d, 2C, <sup>2</sup>*J*<sub>PC</sub> = 13.0 Hz, PCHCH<sub>2</sub>), 38.9 (d, 2C, <sup>1</sup>*J*<sub>PC</sub> = 25.5 Hz, PCH). HRMS (ESI, *m/z* (M + H)<sup>+</sup>) calcd for

$C_{144}H_{121}O_6P_6Cu_6Cl_6$  2727.1472, found 2727.1477. Elemental analysis calcd (%) for  $C_{144}H_{121}O_6P_6Cu_6Cl_6$ : C 63.44, H 4.44; found: C 63.48, H 4.49.

#### 7b

The hydrophosphination step was completed in 45 h. (77% yield based on Cu atoms).  $[\alpha]_D = +38.9$  ( $c$  0.1, DCM). Mp: 226-228°C.  $^{31}P\{^1H\}$  NMR ( $CDCl_3$ , 202 MHz):  $\delta$  -0.8;  $^1H$  NMR ( $CDCl_3$ , 500 MHz):  $\delta$  8.99 (brs, 1H, Ar), 8.15-8.11 (m, 4H, Ar), 7.99-7.95 (m, 4H, Ar), 7.68-7.64 (m, 4H, Ar), 7.38-7.33 (m, 6H, Ar), 6.97-6.85 (m, 13H, Ar), 4.68-4.63 (m, 2H, PCHCHH), 4.47-4.41 (m, 2H, PCHCHH), 3.30-3.24 (m, 2H, PCHCHH);  $^{13}C$  NMR ( $CDCl_3$ , 125 MHz):  $\delta$  196.3 (2C, C=O), 166.7 (1C, CF), 164.7 (1C, CF), 140.1-115.4 (40C, Ar), 43.6 (2C, PCHCH<sub>2</sub>), 38.8 (2C, PCH). HRMS (ESI,  $m/z$  ( $M + H$ )<sup>+</sup>) calcd for  $C_{144}H_{115}O_6P_6Cu_6Cl_6$  2835.0906, found 2835.0898.

#### 7c

The hydrophosphination step was completed in 72 h. (72% yield based on Cu atoms).  $[\alpha]_D = +44.5$  ( $c$  0.1, DCM). Mp: 249-251°C.  $^{31}P\{^1H\}$  NMR ( $CDCl_3$ , 202 MHz):  $\delta$  -1.0;  $^1H$  NMR ( $CDCl_3$ , 500 MHz):  $\delta$  9.00 (brs, 1H, Ar), 8.18-8.14 (m, 4H, Ar), 7.88-7.86 (m, 4H, Ar), 7.67-7.63 (m, 4H, Ar), 7.33-7.32 (m, 6H, Ar), 7.12-7.11 (m, 4H, Ar), 6.93-6.81 (m, 9H, Ar), 4.71-4.66 (m, 2H, PCHCHH), 4.46-4.41 (m, 2H, PCHCHH), 3.32 (dd, 2H,  $J = 17.1$  Hz, 13.5 Hz, PCHCHH), 2.34 (s, 6H,  $C_6H_4CH_3$ );  $^{13}C$  NMR ( $CDCl_3$ , 125 MHz):  $\delta$  197.5 (2C, C=O), 143.6-128.0 (42C, Ar), 43.9 (2C, PCHCH<sub>2</sub>), 38.8 (2C, PCH), 29.8 (1C,  $C_6H_4CH_3$ ), 21.7 (1C,  $C_6H_4CH_3$ ). HRMS (ESI,  $m/z$  ( $M + H$ )<sup>+</sup>) calcd for  $C_{150}H_{133}O_6P_6Cu_6Cl_6$  2811.2415, found 2811.2430.

### Preparation of Copper(I) Cluster 7d

The preparation is similar as above but THF was used in place of toluene.

#### 7d

The hydrophosphination step was completed in 36 h. (89% yield based on Cu atoms).  $[\alpha]_D = +42.0$  ( $c$  0.1, DCM). Mp: 265-268°C.  $^{31}P\{^1H\}$  NMR ( $CDCl_3$ , 202 MHz):  $\delta$  -0.6;  $^1H$  NMR ( $CDCl_3$ , 300 MHz):  $\delta$  9.02 (brs, 1H, Ar), 8.15-8.10 (m, 4H, Ar), 7.73-7.67 (m, 4H, Ar), 7.44-7.33 (m, 9H, Ar), 7.12-7.05 (m, 7H, Ar), 6.93-6.83 (m, 3H, Ar), 6.23 (brs, 2H, Ar), 4.63-4.55 (m, 2H, PCHCHH), 4.19-4.08 (m, 2H, PCHCHH), 3.12-3.03 (m, 2H, PCHCHH);  $^{13}C$  NMR ( $CDCl_3$ , 125 MHz):  $\delta$  186.3 (2C, C=O), 152.0 (2C, C(O)C-O), 146.8 (2C, O-CH=C), 139.7-128.2 (30C, Ar), 119.6 (2C, C(O)C=CH), 112.1 (2C, O-CH=CH), 43.0 (2C, PCHCH<sub>2</sub>), 29.7 (2C, PCH). HRMS (ESI,  $m/z$  ( $M + H$ )<sup>+</sup>) calcd for  $C_{132}H_{109}O_{12}P_6Cu_6Cl_6$  2667.0222, found 2667.0217.

### Preparation of Copper(I) Cluster 7e

The preparation is similar as above but DCM was used as the solvent.

#### 7e

The hydrophosphination step was completed in 12 h. (85% yield based on Cu atoms).  $[\alpha]_D = -19.5$  ( $c$  0.1, DCM). Mp: 221-224°C.  $^{31}P\{^1H\}$  NMR ( $CDCl_3$ , 162 MHz):  $\delta$  2.4;  $^1H$  NMR

(CDCl<sub>3</sub>, 300 MHz):  $\delta$  8.08-7.98 (m, 9H, Ar), 7.44-7.39 (m, 13H, Ar), 6.69-6.66 (m, 1H, Ar), 6.40 (brs, 1H, Ar), 4.71-4.64 (m, 2H, PCH), 4.49-4.45 (m, 2H, PCHCH), 3.04 (brs, 12H, CO<sub>2</sub>CH<sub>3</sub>); <sup>13</sup>C NMR (CDCl<sub>3</sub>, 100 MHz):  $\delta$  167.7 (4C, C=O), 137.9-127.6 (30C, Ar), 53.8 (2C, PCHCH), 52.3 (4C, CO<sub>2</sub>CH<sub>3</sub>), 44.1 (2C, PCH). HRMS (ESI, m/z (M + H)<sup>+</sup>) calcd for C<sub>126</sub>H<sub>121</sub>O<sub>24</sub>P<sub>6</sub>Cu<sub>6</sub>Cl<sub>6</sub> 2799.0549, found 2799.0552.

### Preparation of Copper(I) Cluster 9

To a solution of Ph<sub>2</sub>PH (2.2 equiv) in toluene (10 mL) was added catalyst (*R*)- or (*S*)-**8** (6 mol %) and stirred for 10 minutes before cooling to -80°C. Diunsaturated alkene (1.0 equiv) was added followed by NEt<sub>3</sub> (2.0 equiv) in toluene (1 mL) dropwise. The solution was stirred at -80°C and the completion of the reaction was monitored by the disappearance of the phosphorous signal attributed to diphenylphosphine (-40 ppm) in the <sup>31</sup>P{<sup>1</sup>H} NMR spectrum. Upon completion, the solution was allowed to room temperature. Volatiles were removed under reduced pressure. The crude product was redissolved in acetone (10 mL) and CuCl<sub>2</sub> (2.0 equiv) was added. The mixture was refluxed overnight and on cooling, concentrated to give the crude complex, which was purified *via* silica gel column chromatography (DCM or 9 DCM : 1 EA) to afford white solid of the clusters **9**. 3% yield based on Cu atoms. [ $\alpha$ ]<sub>D</sub> = +39.5 (*c* 0.1, DCM). Mp: 257-259°C. <sup>31</sup>P{<sup>1</sup>H} NMR (CDCl<sub>3</sub>, 202 MHz):  $\delta$  44.4; <sup>1</sup>H NMR (CDCl<sub>3</sub>, 300 MHz):  $\delta$  8.04-8.02 (m, 4H, Ar), 7.92-7.89 (m, 4H, Ar), 7.41-7.33 (m, 19H, Ar), 7.16 (t, 4H, <sup>3</sup>J = 7.7 Hz, 12.8 Hz, Ar), 7.05 (d, 2H, <sup>3</sup>J = 7.5 Hz, Ar), 6.79 (t, 1H, <sup>3</sup>J = 7.3 Hz, Ar), 4.91-4.90 (m, 2H, PCHCHH), 3.42-4.25 (m, 2H, PCHCHH), 3.07-2.96 (m, 2H, PCHCHH); <sup>13</sup>C NMR (CDCl<sub>3</sub>, 125 MHz):  $\delta$  198.0 (2C, C=O), 135.1-124.7 (42C, Ar), 48.0 (2C, PCHCH<sub>2</sub>), 44.8 (2C, PCH). HRMS (ESI, m/z (M + H)<sup>+</sup>) calcd for C<sub>96</sub>H<sub>81</sub>O<sub>4</sub>P<sub>4</sub>Cu<sub>4</sub>Cl<sub>4</sub> 1818.1023, found 1818.1033.

### General Procedure for Catalytic Hydroboration

Under a nitrogen atmosphere, Cu(I) cluster **7a** (2.7 mg, 1.0  $\mu$ mol, 1 mol %), base (10 mol %) and B<sub>2</sub>pin<sub>2</sub> (27.9 mg, 0.11 mmol, 1.1 equiv.) in solvent (2 mL) was stirred for 10 mins. Enone (20.8 mg, 0.10 mmol, 1.0 equiv.) and MeOH (8.1  $\mu$ L, 0.20 mmol, 2.0 equiv.) was added consecutively and stirred. The completion of the reaction was determined by TLC analysis and confirmed by <sup>1</sup>H NMR. The solvent was removed under reduced pressure and the crude product was purified by flash column chromatography to afford the desired product. The data were consistent with the literature.<sup>[2]</sup> The *ee* was determined on a Daicel Chiralpak AD-H column with n-hexane/2-propanol = 97/3, flow = 0.9 mL/min, wavelength = 210 nm. Retention times: 8.7 min, 12.4 min.

### Reference

- [1] Y. Huang, R. J. Chew, Y. Li, S. A. Pullarkat, P. H. Leung, *Org. Lett.* **2011**, *13*, 5862.
- [2] Zhao, L.; Ma, Y.; He, F.; Duan, W.; Chen, J.; Song, C. *J. Org. Chem.* **2013**, *78*, 1677.

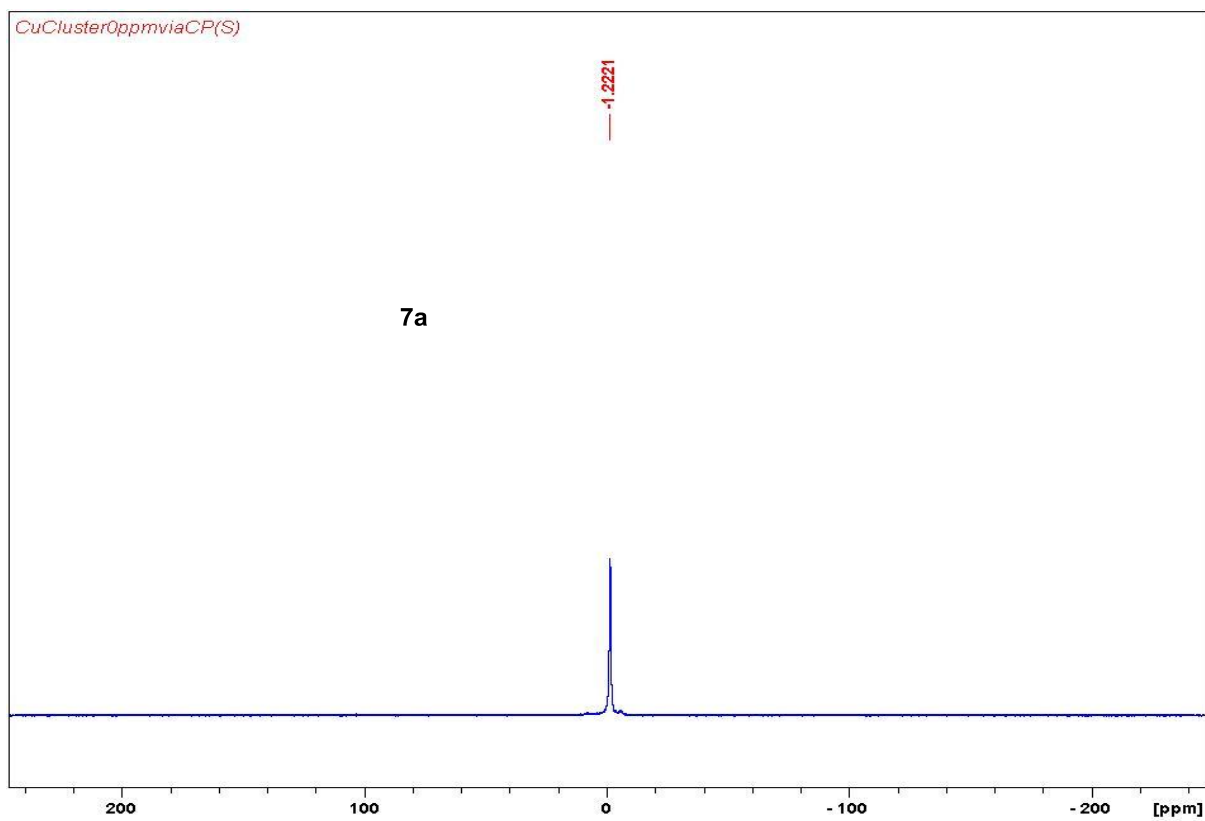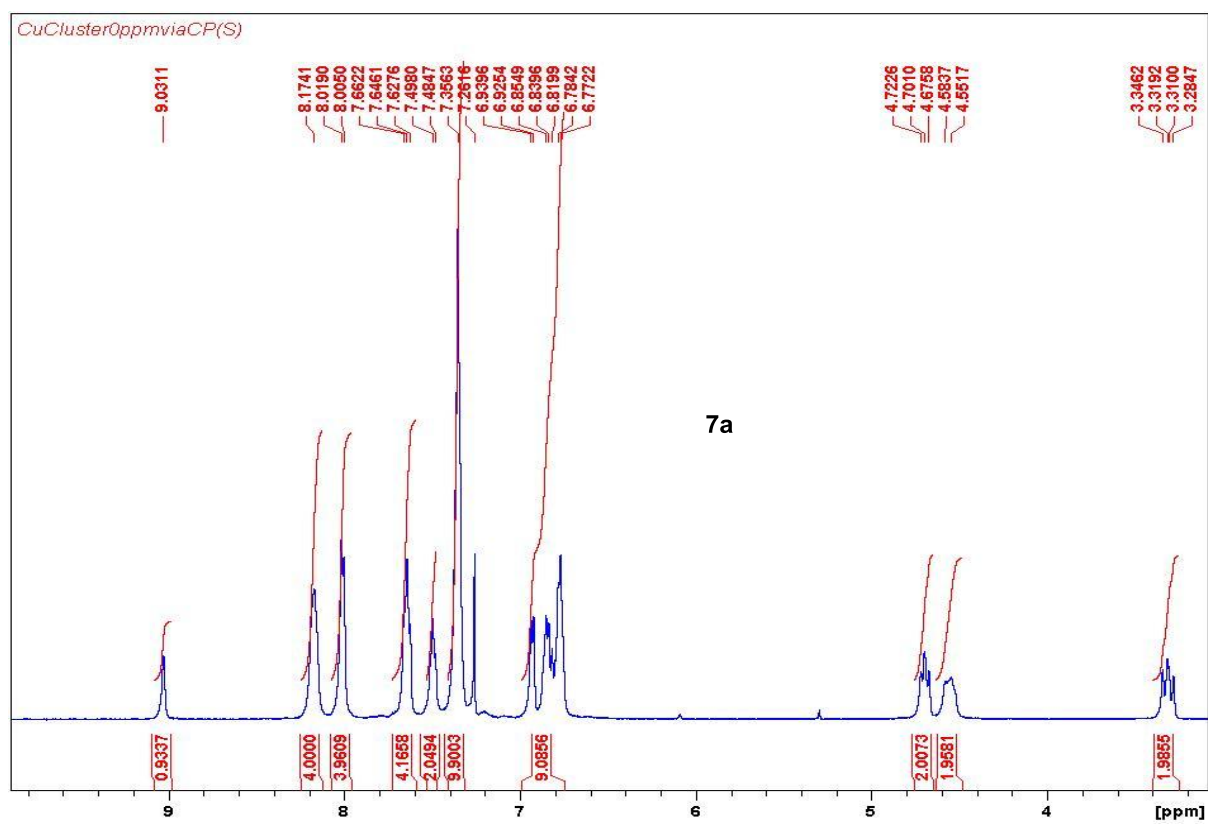

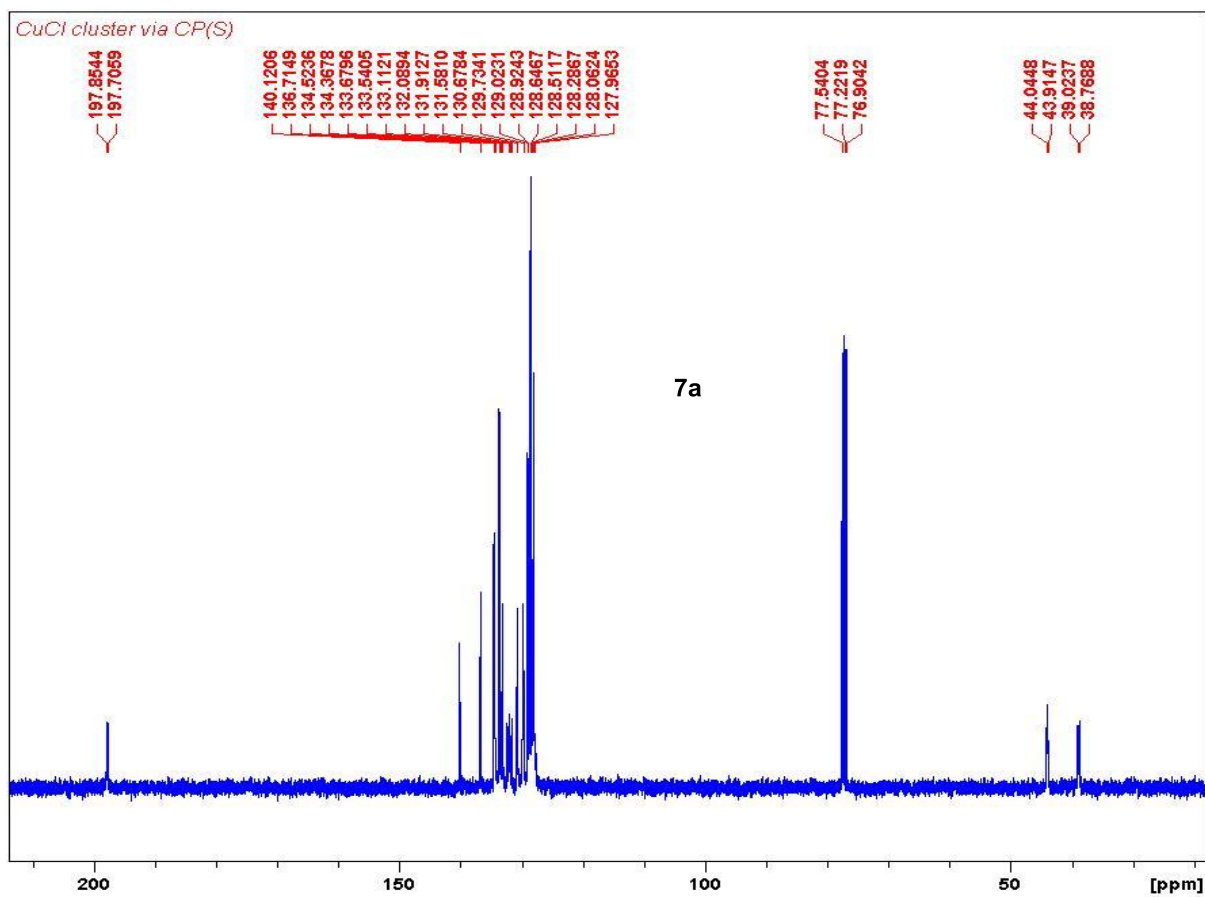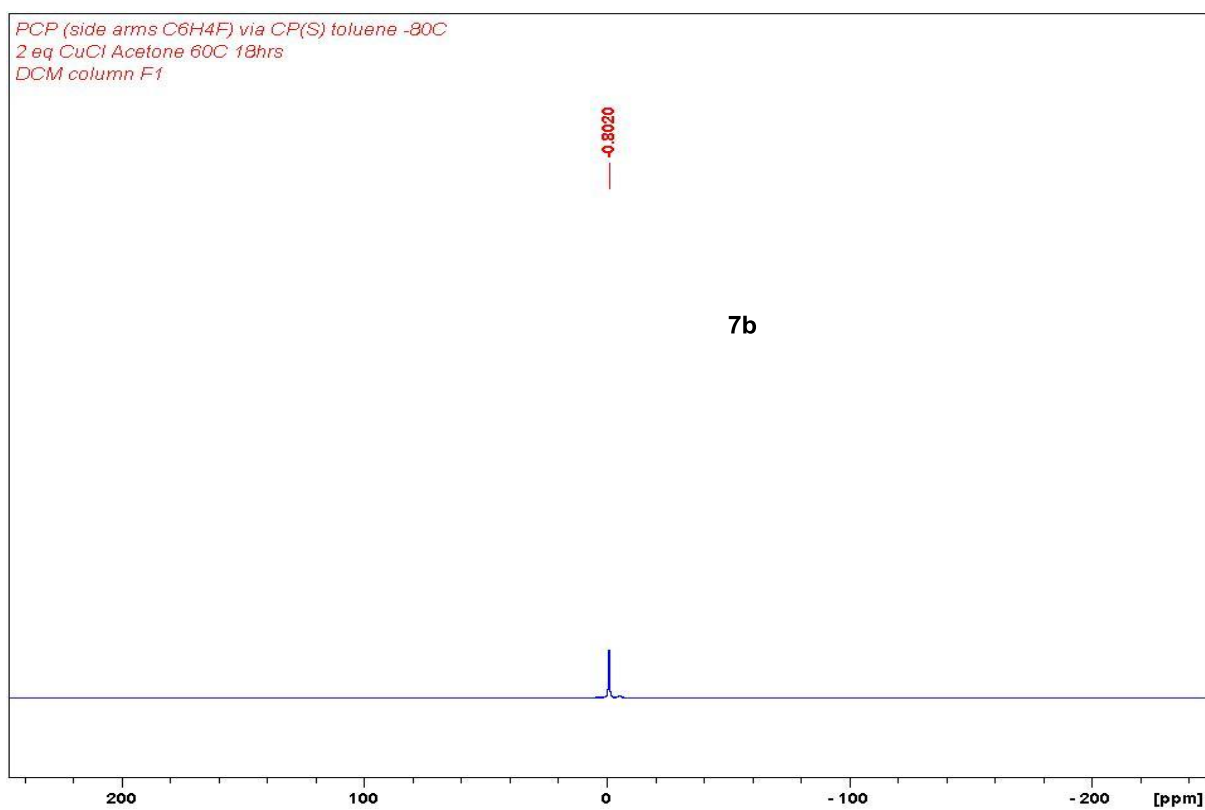

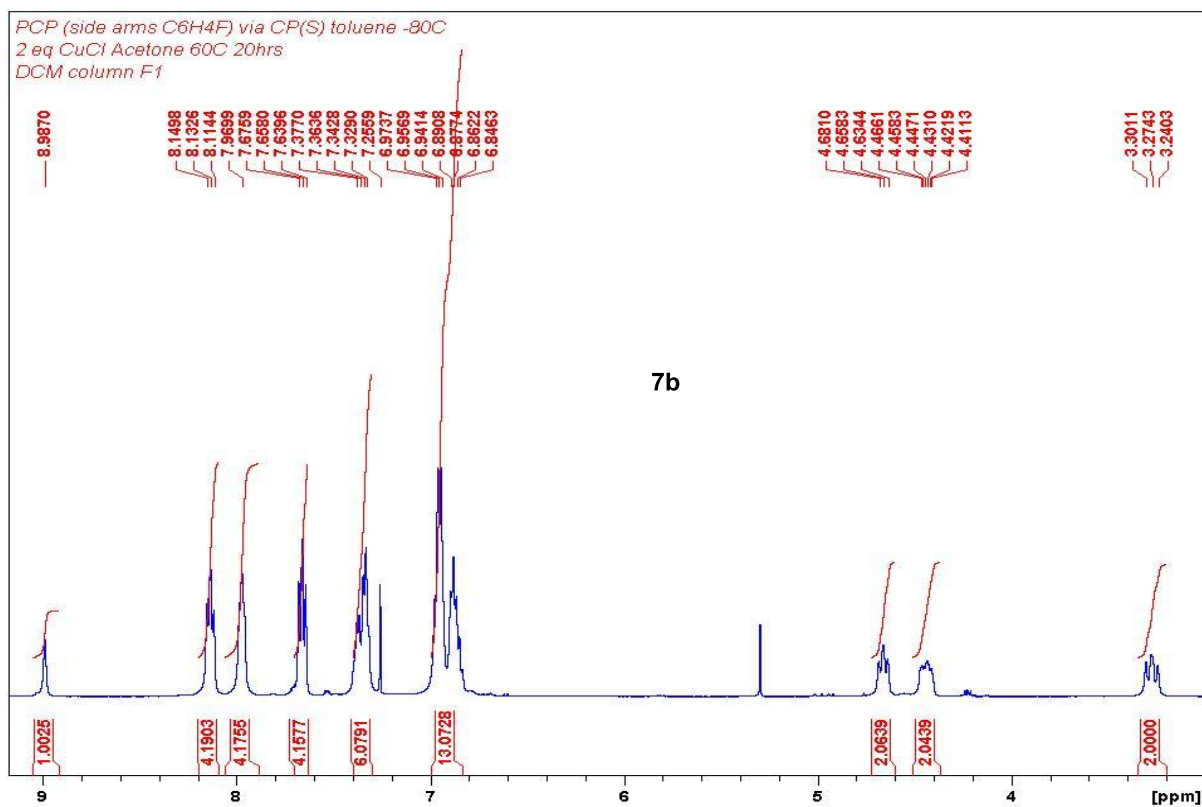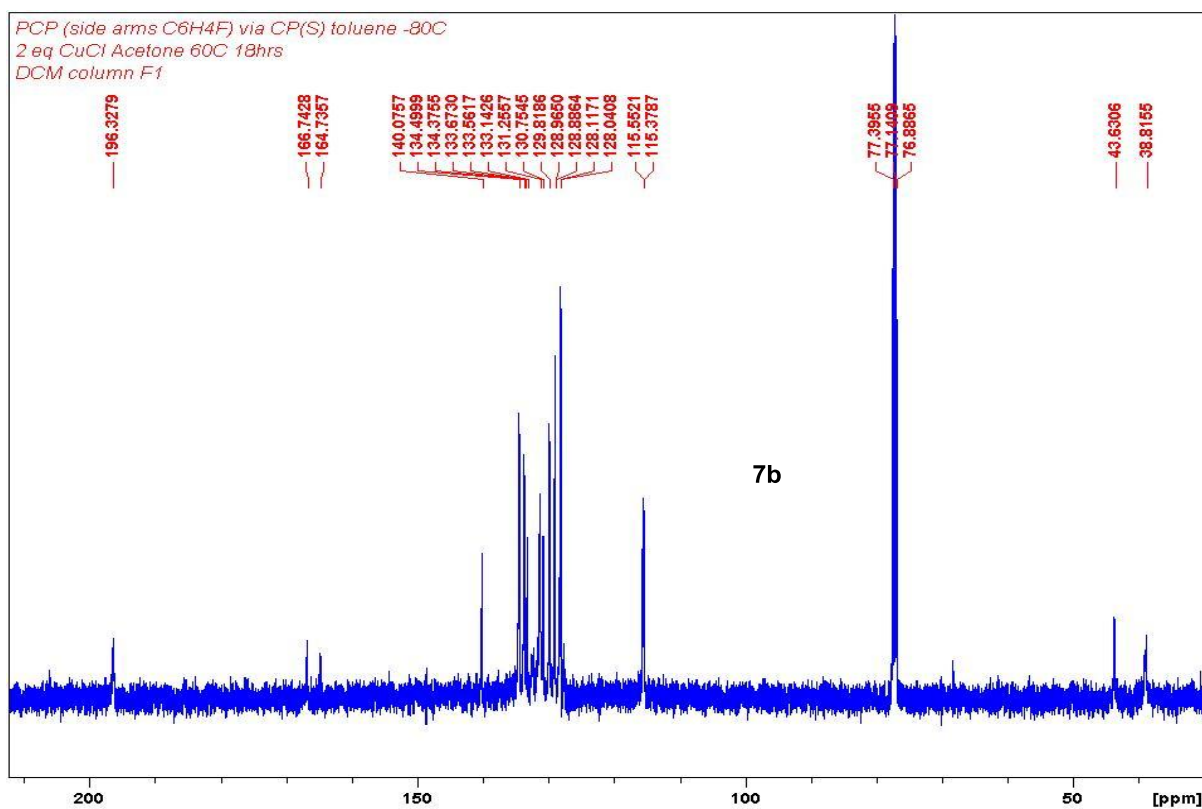

Diphosphine (side chain C<sub>6</sub>H<sub>4</sub>Me) via CP(S) toluene -80C  
 2 eq CuCl Acetone 65C 20 hrs  
 DCM column F1

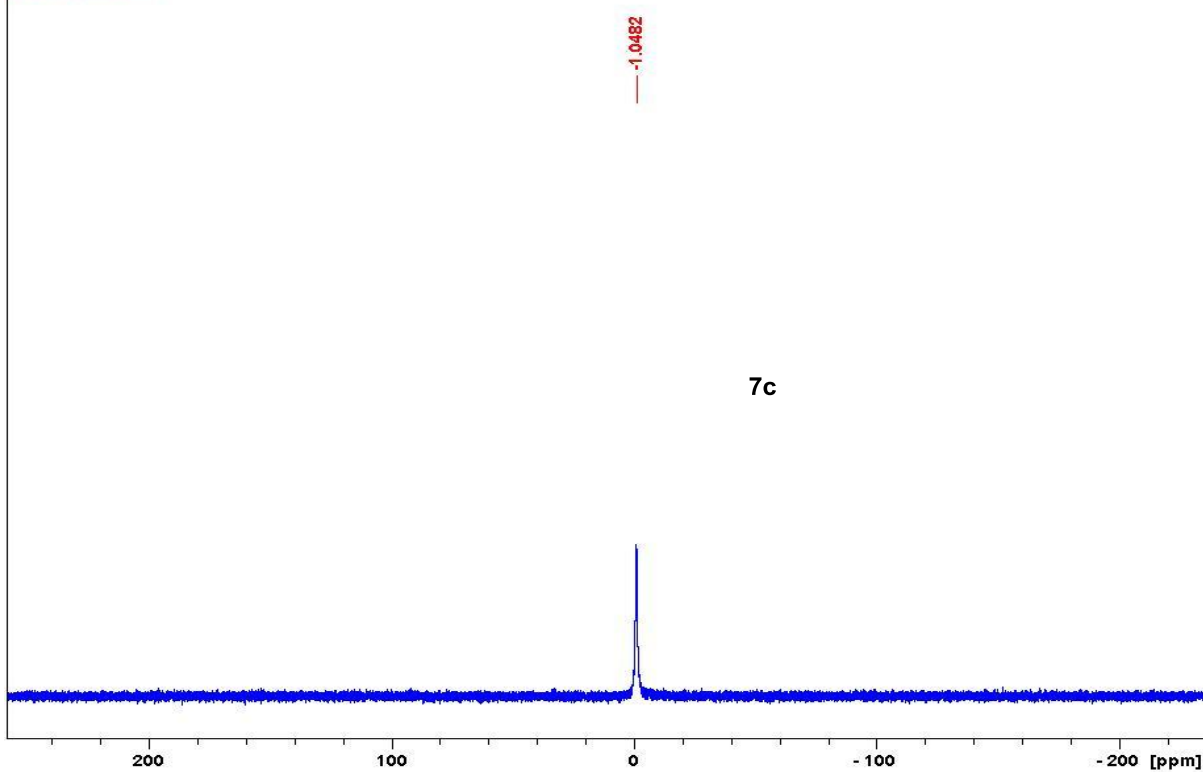

Cu cluster 0 ppm via CP(S)  
 Toluene -80C  
 Diphosphine (side arm C<sub>6</sub>H<sub>4</sub>Me)

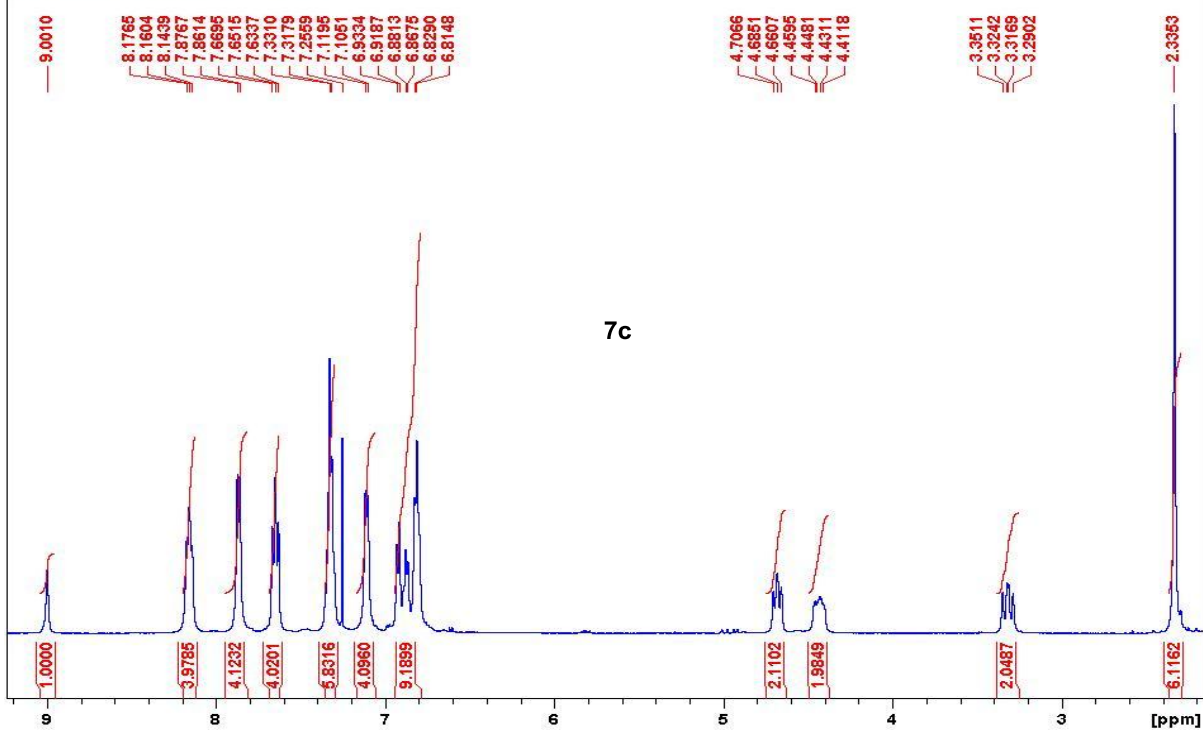



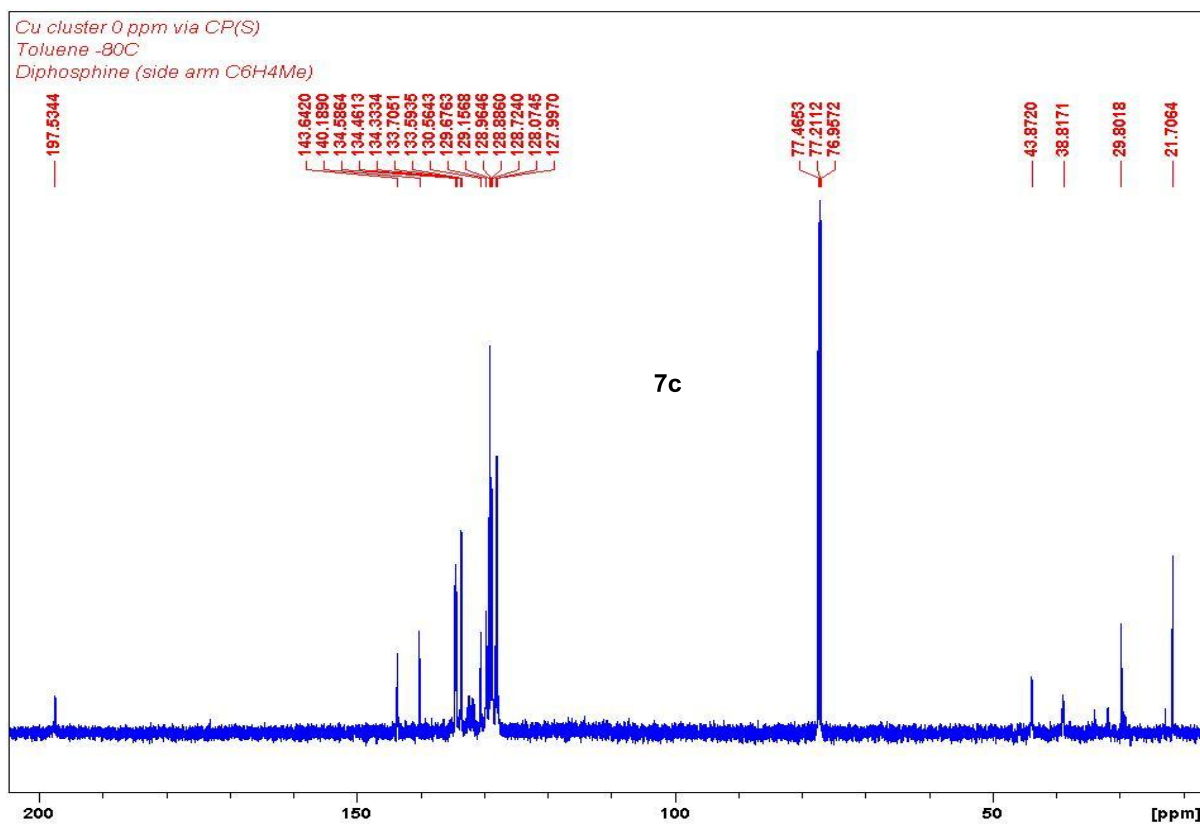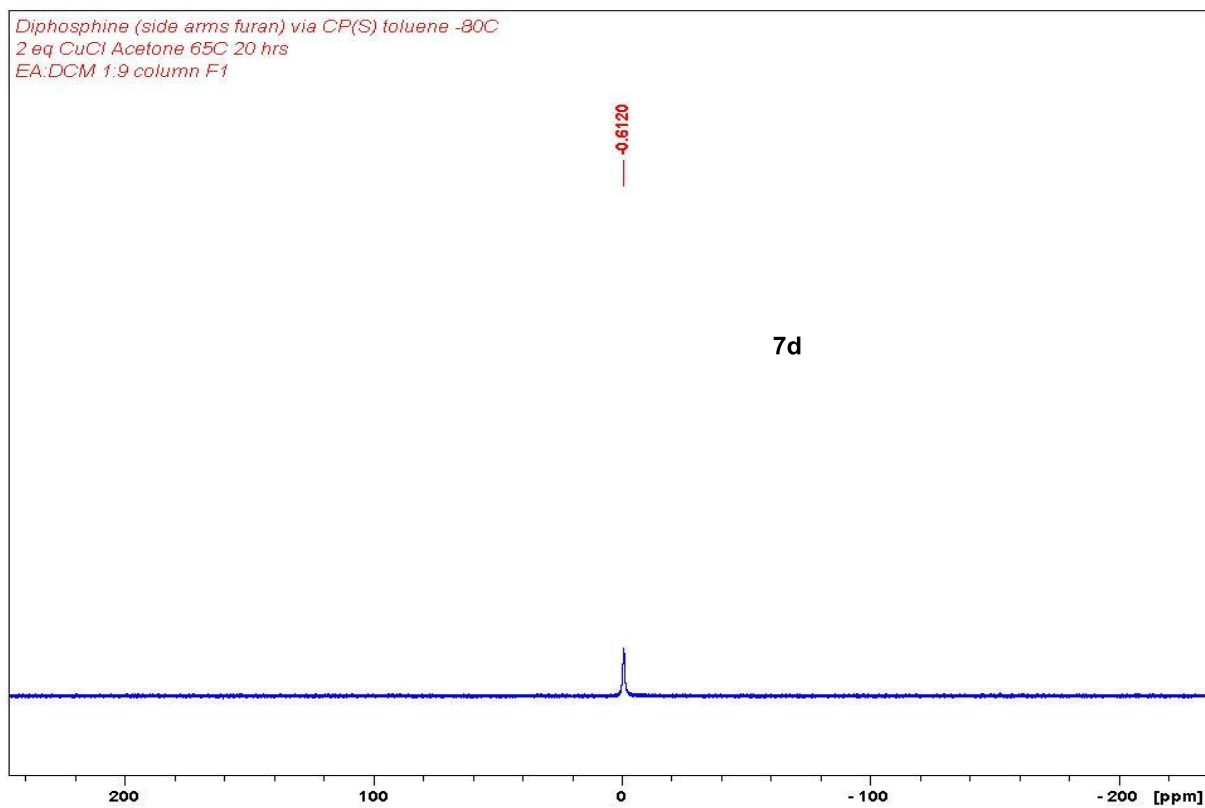

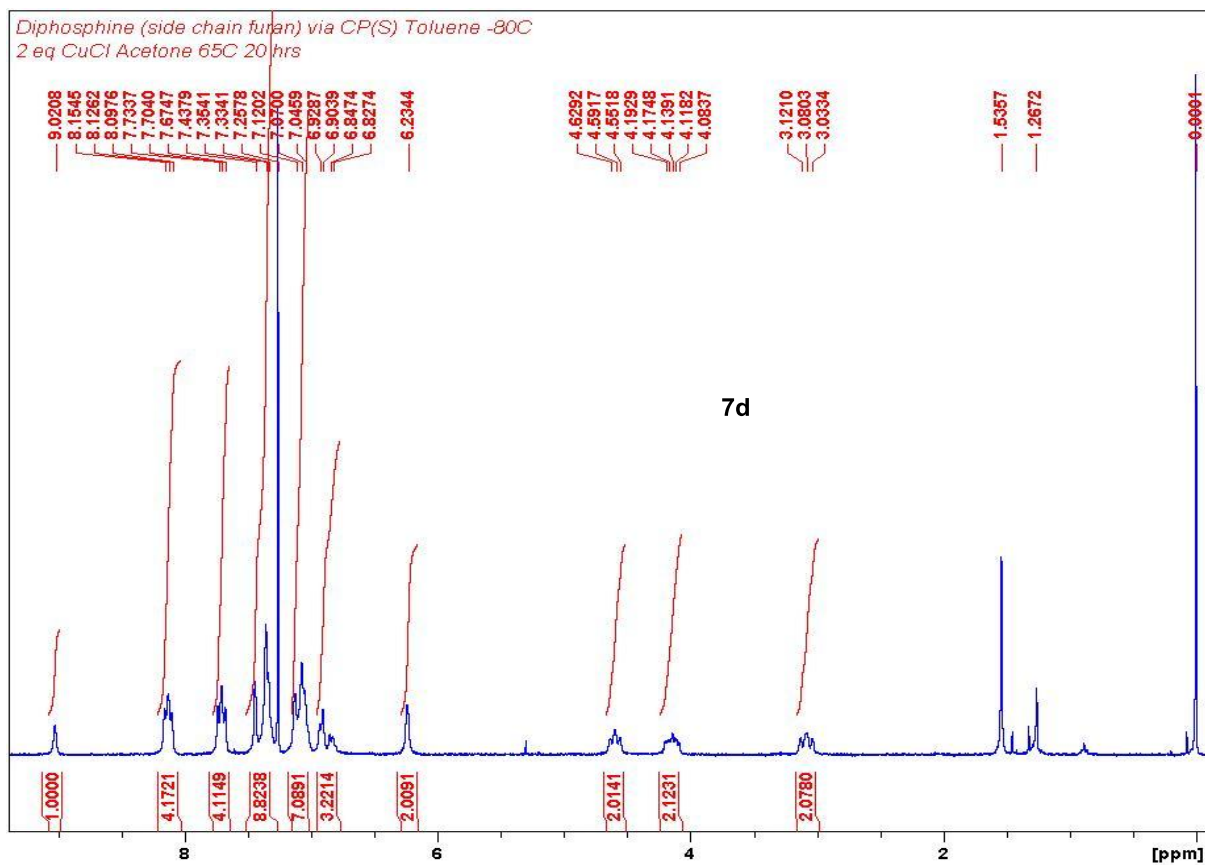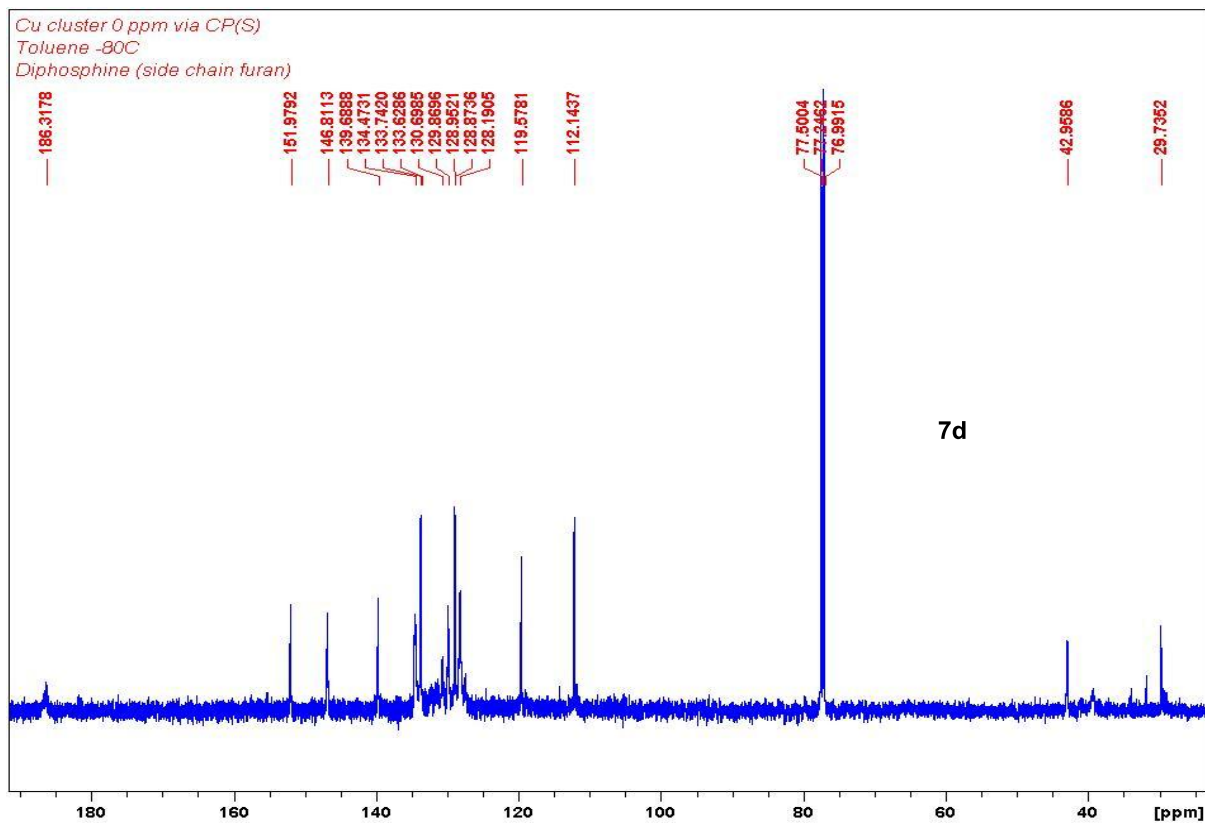

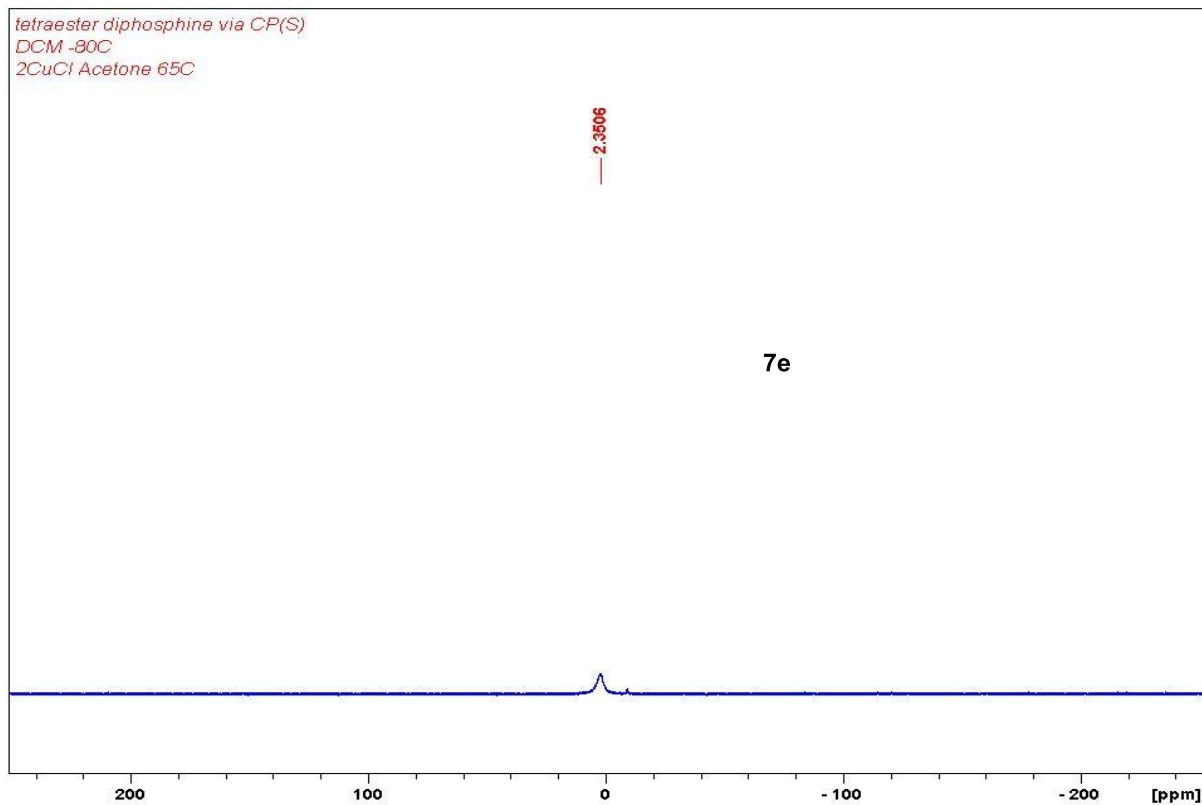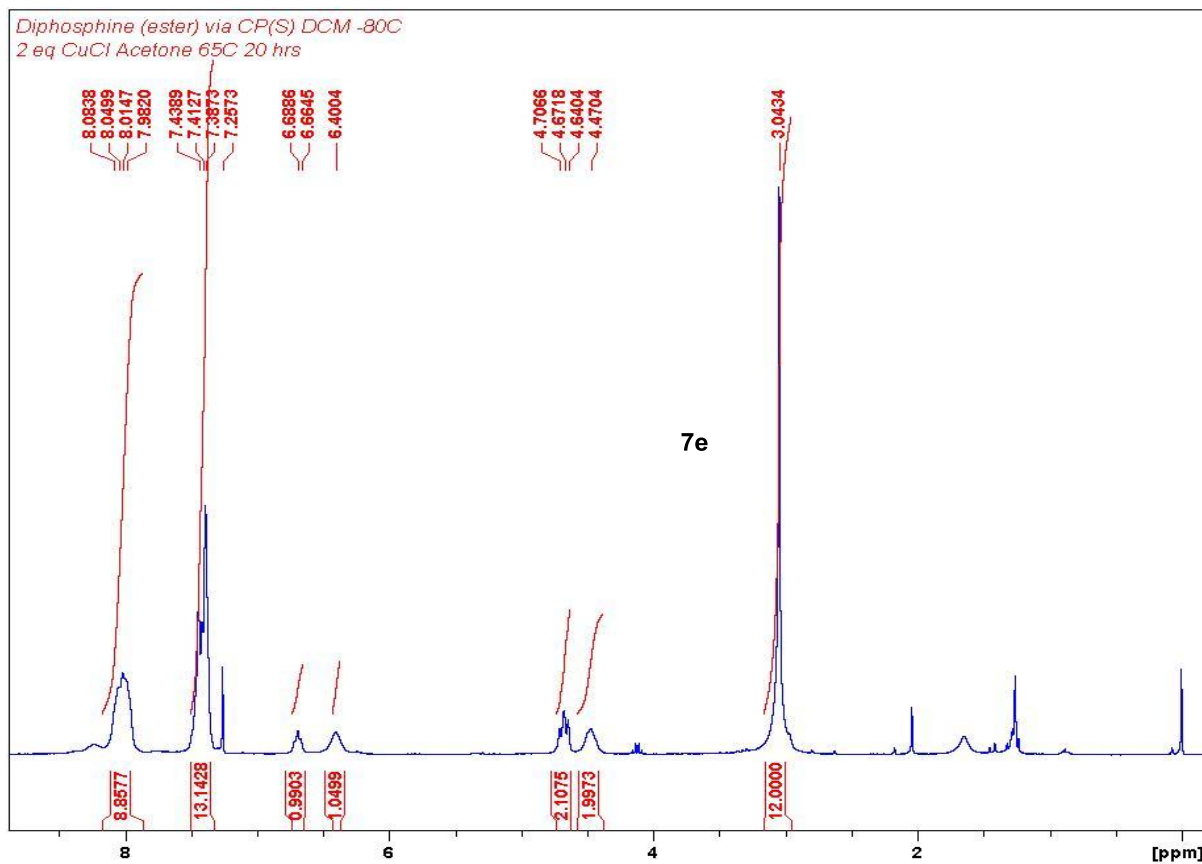

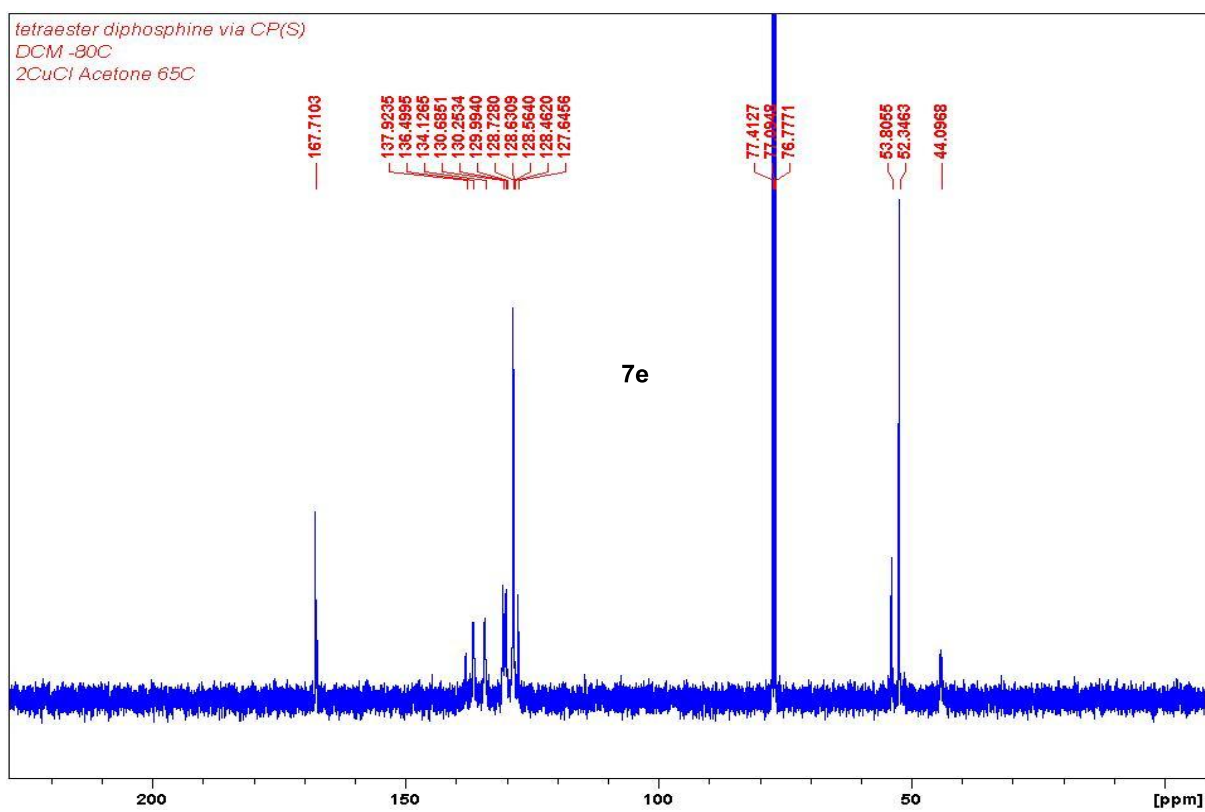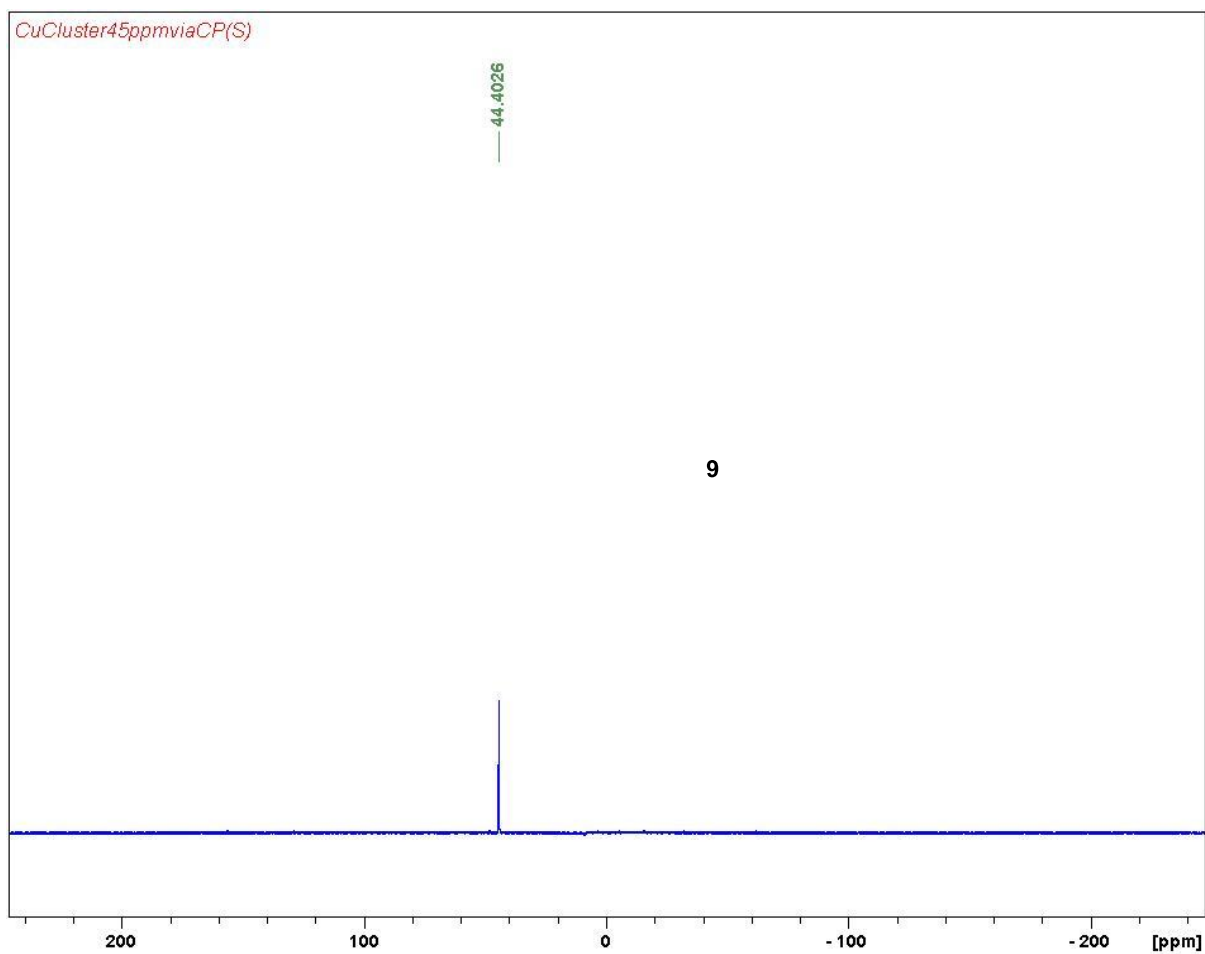

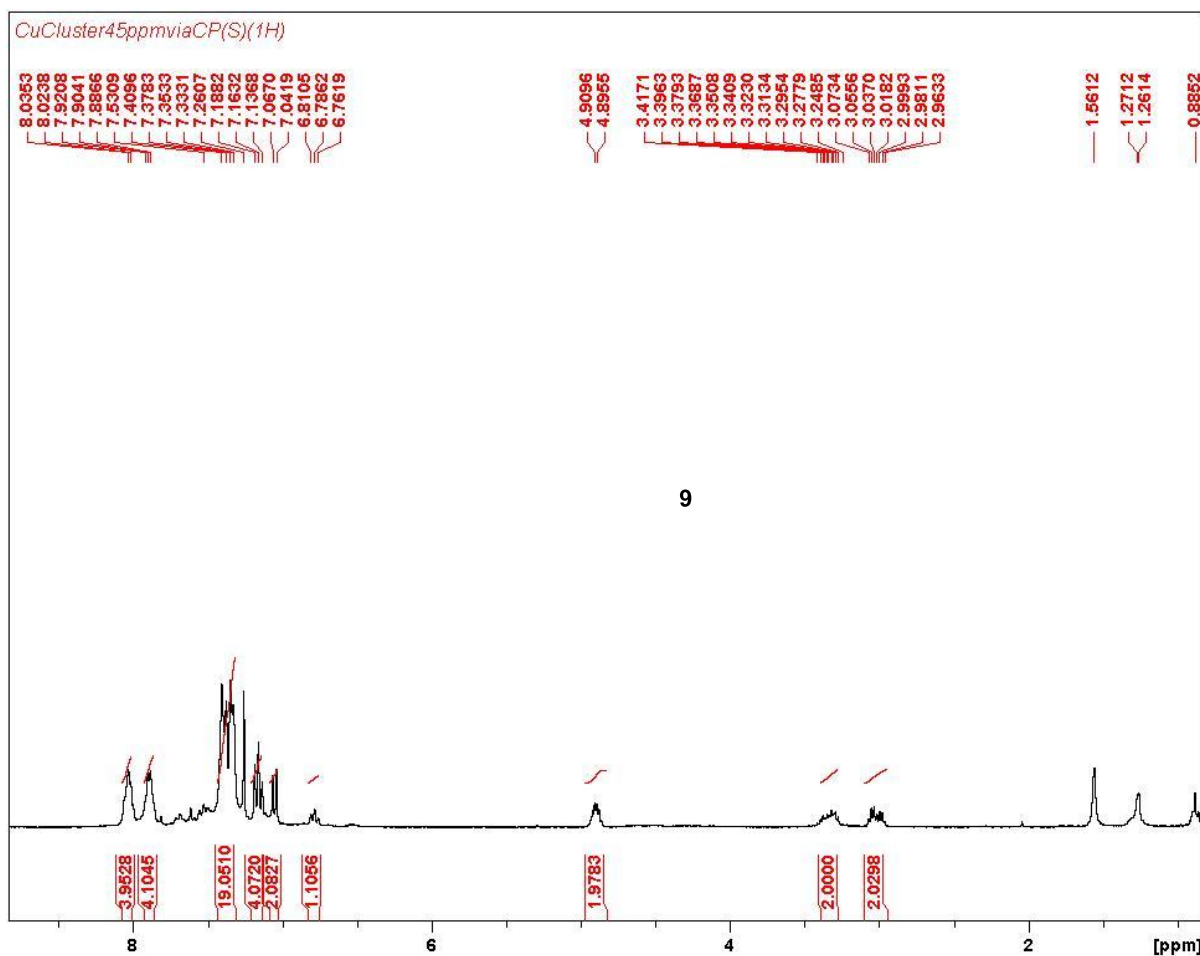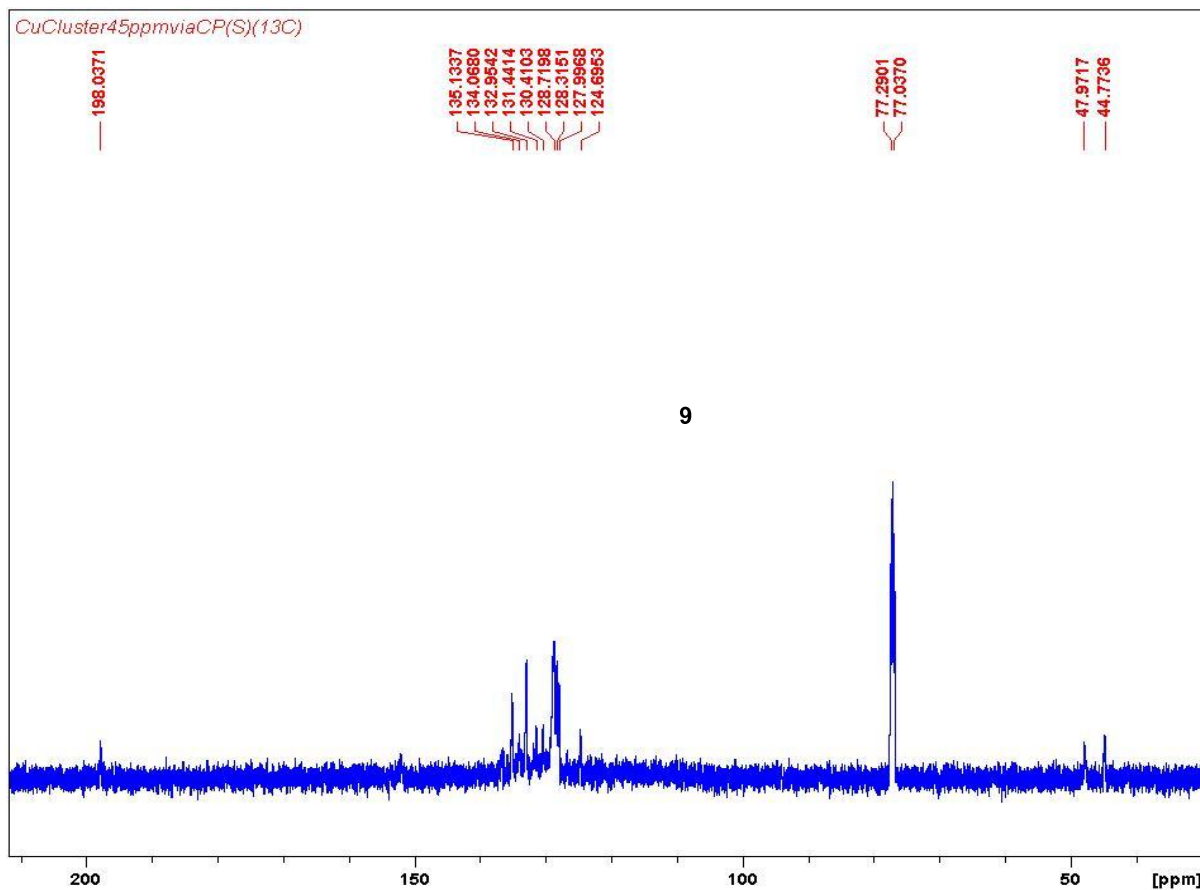

## HPLC Spectra

Sample Info : Chalcone 1eq + B2pin2 1.1eq + Cs2CO3 10% + MeOH 2eq  
 Racemic  
 Eluant: 97H:3IPA Flow Rate: 0.9 mL/min Column: AD-H 23C

Additional Info : Peak(s) manually integrated

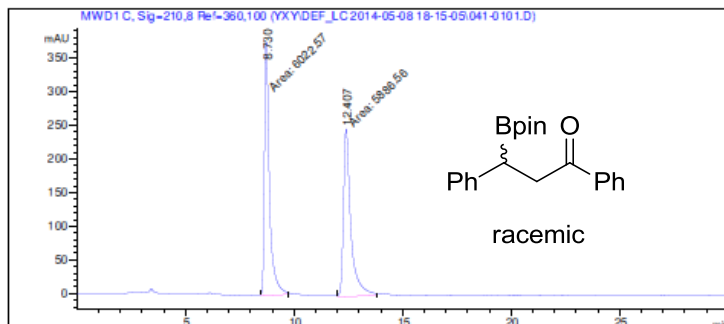

### Area Percent Report

Sorted By : Signal  
 Multiplier: : 1.0000  
 Dilution: : 1.0000  
 Use Multiplier & Dilution Factor with ISTDs

Signal 1: MWD1 C, Sig=210,8 Ref=360,100

| Peak # | RetTime [min] | Type | Width [min] | Area [mAU*s] | Height [mAU] | Area %  |
|--------|---------------|------|-------------|--------------|--------------|---------|
| 1      | 8.730         | MM   | 0.2668      | 6022.56982   | 376.22086    | 50.5710 |
| 2      | 12.407        | MM   | 0.3946      | 5886.56006   | 248.62212    | 49.4290 |

Totals : 1.19091e4 624.84297

## Table 5 Entry 1.

Sample Info : Chalcone 1eq + B2pin2 1.1eq + Cs2CO3 10% + MeOH 2eq  
 1% CuCl cluster RT 1h THF  
 Eluant: 97H:3IPA Flow Rate: 0.9 mL/min Column: AD-H 23C

Additional Info : Peak(s) manually integrated

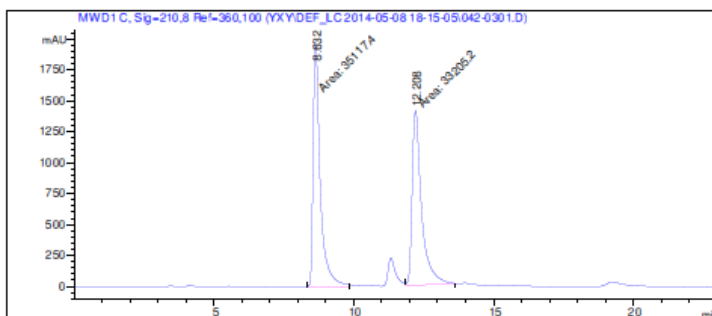

### Area Percent Report

Sorted By : Signal  
 Multiplier: : 1.0000  
 Dilution: : 1.0000  
 Use Multiplier & Dilution Factor with ISTDs

Signal 1: MWD1 C, Sig=210,8 Ref=360,100

| Peak # | RetTime [min] | Type | Width [min] | Area [mAU*s] | Height [mAU] | Area %  |
|--------|---------------|------|-------------|--------------|--------------|---------|
| 1      | 8.632         | MM   | 0.2962      | 3.51174e4    | 1975.95789   | 51.3994 |
| 2      | 12.208        | MM   | 0.3924      | 3.32052e4    | 1410.25415   | 48.6006 |

Totals : 6.83226e4 3386.21204

## Table 5 Entry 2.

Sample Info : Chalcone 1eq + B2pin2 1.1eq + Cs2CO3 10% + MeOH 2eq  
1% CuCl cluster RT 1h DEE  
Eluant: 97H:3IPA Flow Rate: 0.9 mL/min Column: AD-H 23C

Additional Info : Peak(s) manually integrated

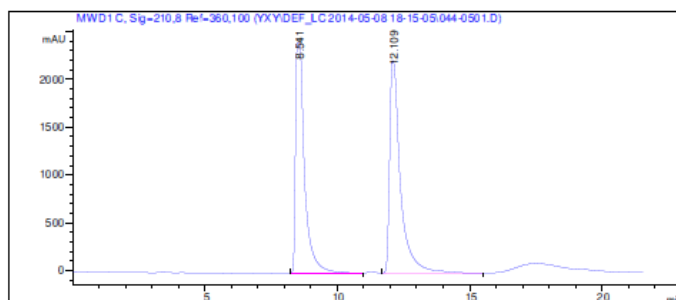

### Area Percent Report

Sorted By : Signal  
Multiplier: : 1.0000  
Dilution: : 1.0000  
Use Multiplier & Dilution Factor with ISTDs

Signal 1: MWD1 C, Sig=210,8 Ref=360,100

| Peak # | RetTime [min] | Type | Width [min] | Area [mAU*s] | Height [mAU] | Area %  |
|--------|---------------|------|-------------|--------------|--------------|---------|
| 1      | 8.541         | BV   | 0.3246      | 5.76537e4    | 2414.60400   | 47.8608 |
| 2      | 12.109        | VB   | 0.4204      | 6.28076e4    | 2217.89673   | 52.1392 |

Totals : 1.20461e5 4632.50073

## Table 5 Entry 3.

Sample Info : Chalcone 1eq + B2pin2 1.1eq + Cs2CO3 10% + MeOH 2eq  
1% CuCl cluster RT 2h EA  
Eluant: 97H:3IPA Flow Rate: 0.9 mL/min Column: AD-H 23C

Additional Info : Peak(s) manually integrated

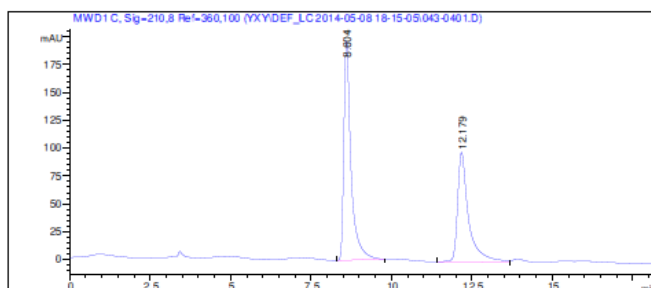

### Area Percent Report

Sorted By : Signal  
Multiplier: : 1.0000  
Dilution: : 1.0000  
Use Multiplier & Dilution Factor with ISTDs

Signal 1: MWD1 C, Sig=210,8 Ref=360,100

| Peak # | RetTime [min] | Type | Width [min] | Area [mAU*s] | Height [mAU] | Area %  |
|--------|---------------|------|-------------|--------------|--------------|---------|
| 1      | 8.604         | BV   | 0.2265      | 3042.97852   | 196.69609    | 56.7813 |
| 2      | 12.179        | BV   | 0.3412      | 2316.14526   | 98.17410     | 43.2187 |

Totals : 5359.12378 294.87019

## Table 5 Entry 4.

Sample Info : Chalcone 1eq + B2pin2 1.1eq + KOTBu 10% + MeOH 2eq  
1% CuCl cluster RT 0.5h EA  
Eluant: 97H:3IPA Flow Rate: 0.9 mL/min Column: AD-H 23C

Additional Info : Peak(s) manually integrated

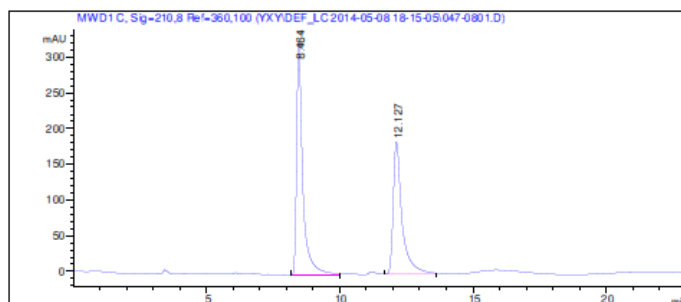

### Area Percent Report

Sorted By : Signal  
Multiplier: : 1.0000  
Dilution: : 1.0000  
Use Multiplier & Dilution Factor with ISTDs

Signal 1: MWD1 C, Sig-210,8 Ref-360,100

| Peak # | RetTime [min] | Type | Width [min] | Area [mAU*s] | Height [mAU] | Area %  |
|--------|---------------|------|-------------|--------------|--------------|---------|
| 1      | 8.464         | BV   | 0.2341      | 5258.86377   | 326.16217    | 55.6017 |
| 2      | 12.127        | BB   | 0.3310      | 4199.24268   | 184.89804    | 44.3983 |

Totals : 9458.10645 511.06021

## Table 5 Entry 5.

Sample Info : Chalcone 1eq + B2pin2 1.1eq + Cs2CO3 10% + MeOH 2eq  
1% CuCl cluster RT 1h DCM  
Eluant: 97H:3IPA Flow Rate: 0.9 mL/min Column: AD-H 23C

Additional Info : Peak(s) manually integrated

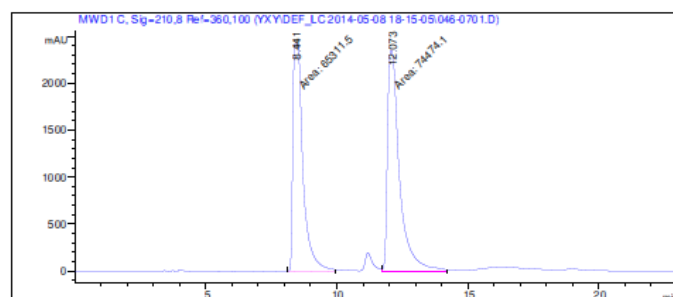

### Area Percent Report

Sorted By : Signal  
Multiplier: : 1.0000  
Dilution: : 1.0000  
Use Multiplier & Dilution Factor with ISTDs

Signal 1: MWD1 C, Sig-210,8 Ref-360,100

| Peak # | RetTime [min] | Type | Width [min] | Area [mAU*s] | Height [mAU] | Area %  |
|--------|---------------|------|-------------|--------------|--------------|---------|
| 1      | 8.441         | MM   | 0.4468      | 6.53115e4    | 2436.49878   | 46.7226 |
| 2      | 12.073        | MM   | 0.5278      | 7.44741e4    | 2351.66504   | 53.2774 |

Totals : 1.39786e5 4788.16382



## Table 5 Entry 6.

Sample Info : chalcone + B2pin2 + Cs2CO3 10% + MeOH 2eq  
1% CuCl cluster 7b RT EA 2h  
Eluant: 97H:3IPA 0.9 mL/min  
Column: AD-H 23C

Additional Info : Peak(s) manually integrated

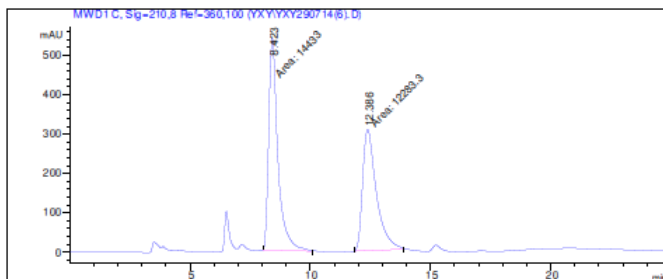

### Area Percent Report

Sorted By : Signal  
Multiplier: : 1.0000  
Dilution: : 1.0000  
Sample Amount: : 1.00000 [ng/ul] (not used in calc.)  
Use Multiplier & Dilution Factor with ISTDs

Signal 1: MWD1 C, Sig=210,8 Ref=360,100

| Peak # | RetTime [min] | Type | Width [min] | Area [mAU*s] | Height [mAU] | Area %  |
|--------|---------------|------|-------------|--------------|--------------|---------|
| 1      | 8.423         | MM   | 0.4454      | 1.44330e4    | 540.04266    | 54.0232 |
| 2      | 12.386        | MM   | 0.6643      | 1.22833e4    | 308.16833    | 45.9768 |

Totals : 2.67163e4 848.21100

## Table 5 Entry 7.

Sample Info : chalcone + B2pin2 + Cs2CO3 10% + MeOH 2eq  
1% CuCl cluster 7c RT EA 2h  
Eluant: 97H:3IPA 0.9 mL/min  
Column: AD-H 23C

Additional Info : Peak(s) manually integrated

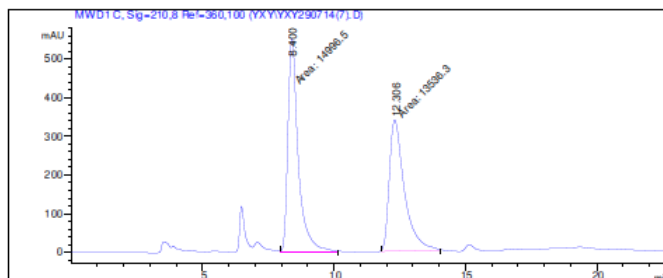

### Area Percent Report

Sorted By : Signal  
Multiplier: : 1.0000  
Dilution: : 1.0000  
Sample Amount: : 1.00000 [ng/ul] (not used in calc.)  
Use Multiplier & Dilution Factor with ISTDs

Signal 1: MWD1 C, Sig=210,8 Ref=360,100

| Peak # | RetTime [min] | Type | Width [min] | Area [mAU*s] | Height [mAU] | Area %  |
|--------|---------------|------|-------------|--------------|--------------|---------|
| 1      | 8.400         | MM   | 0.4540      | 1.49965e4    | 550.57251    | 52.5589 |
| 2      | 12.306        | MM   | 0.6652      | 1.35363e4    | 339.17816    | 47.4411 |

Totals : 2.85328e4 889.75067

## Table 5 Entry 8.

Sample Info : chalcone + B2pin2 + Cs2CO3 10% + MeOH 2eq  
1% CuCl cluster 7d RT EA 3h  
Eluant: 97H:3IPA 0.9 mL/min  
Column: AD-H 23C

Additional Info : Peak(s) manually integrated

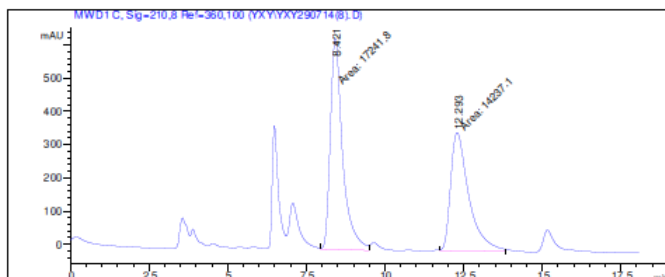

### Area Percent Report

Sorted By : Signal  
Multiplier: : 1.0000  
Dilution: : 1.0000  
Sample Amount: : 1.00000 [ng/ul] (not used in calc.)  
Use Multiplier & Dilution Factor with ISTDs

Signal 1: MWD1 C, Sig-210,8 Ref-360,100

| Peak # | RetTime [min] | Type | Width [min] | Area [mAU*s] | Height [mAU] | Area %  |
|--------|---------------|------|-------------|--------------|--------------|---------|
| 1      | 8.421         | MM   | 0.4531      | 1.72418e4    | 634.19000    | 54.7726 |
| 2      | 12.293        | MM   | 0.6660      | 1.42371e4    | 356.30414    | 45.2274 |

Totals : 3.14789e4 990.49414

## Table 5 Entry 9.

Sample Info : chalcone + B2pin2 + Cs2CO3 10% + MeOH 2eq  
1% CuCl cluster 7e RT EA 2h  
Eluant: 97H:3IPA 0.9 mL/min  
Column: AD-H 23C

Additional Info : Peak(s) manually integrated

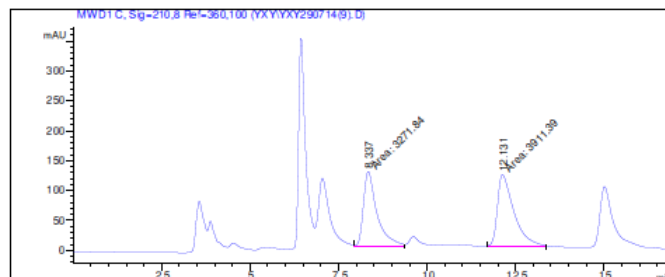

### Area Percent Report

Sorted By : Signal  
Multiplier: : 1.0000  
Dilution: : 1.0000  
Sample Amount: : 1.00000 [ng/ul] (not used in calc.)  
Use Multiplier & Dilution Factor with ISTDs

Signal 1: MWD1 C, Sig-210,8 Ref-360,100

| Peak # | RetTime [min] | Type | Width [min] | Area [mAU*s] | Height [mAU] | Area %  |
|--------|---------------|------|-------------|--------------|--------------|---------|
| 1      | 8.337         | MM   | 0.4395      | 3271.84058   | 124.06229    | 45.5483 |
| 2      | 12.131        | MM   | 0.5424      | 3911.39111   | 120.18320    | 54.4517 |

Totals : 7183.23169 244.24548

## NMR Spectra of Product formed between Diphosphine 5a and CuI

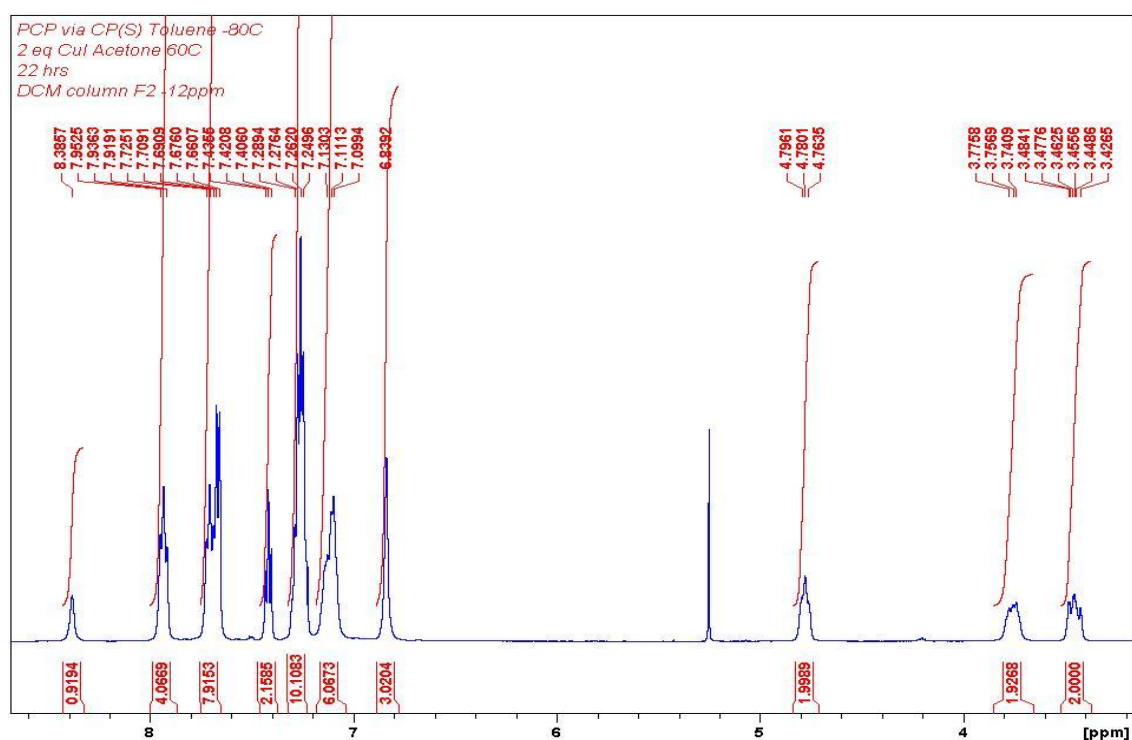

Figure A. <sup>1</sup>H NMR Spectrum of Complex.

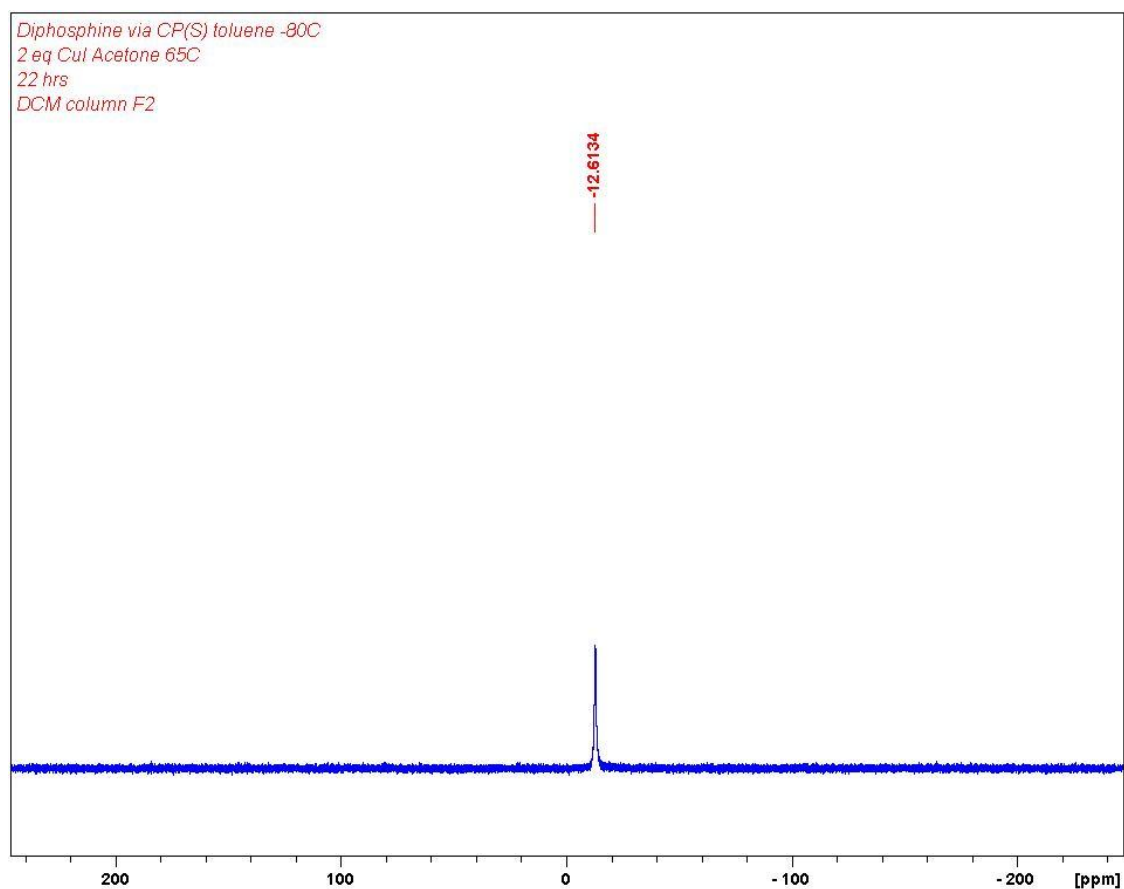

Figure B. <sup>31</sup>P{<sup>1</sup>H} NMR Spectrum of Complex.

### Determination of *ee* and *de* for Ligand 6

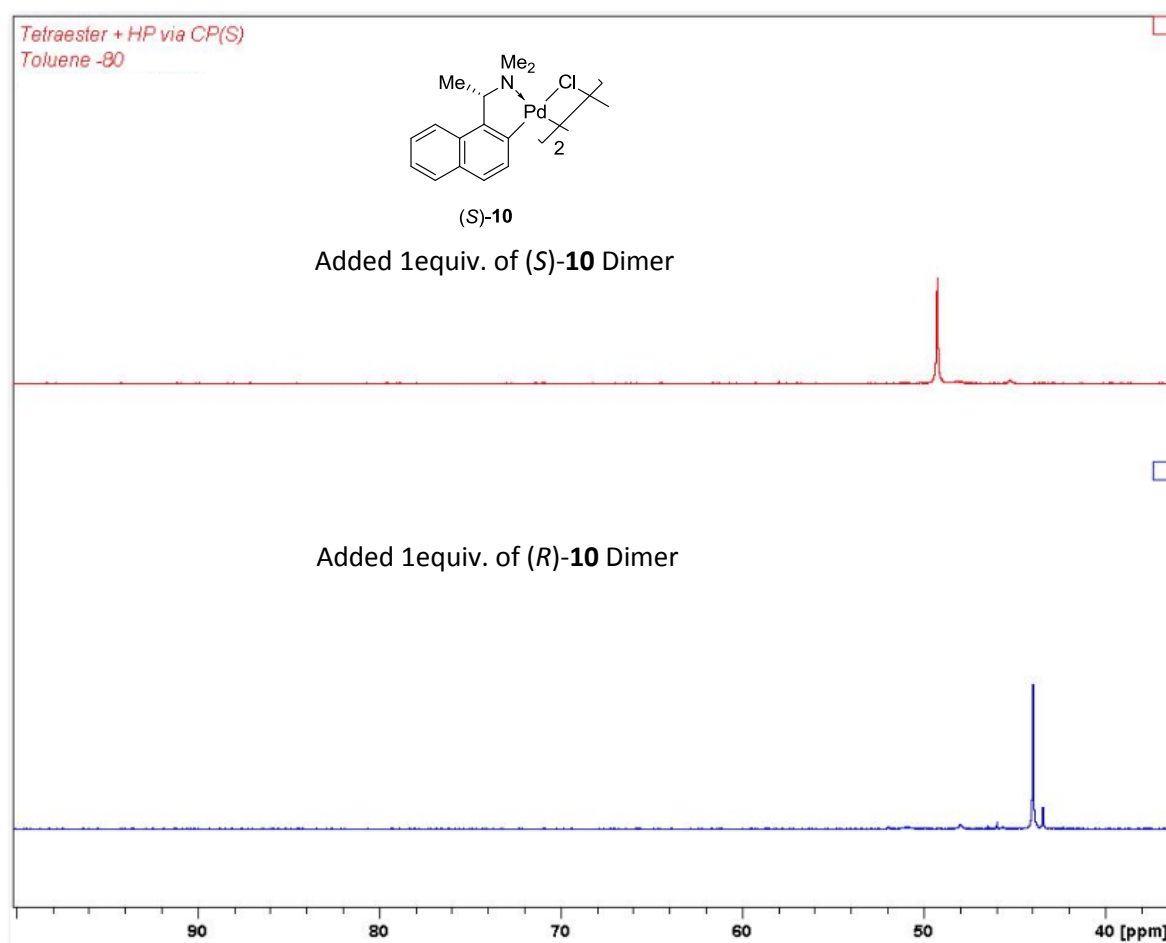Figure C. Determination of  $ee$  and  $de$  for Ligand **6**.

The determination of enantio- and diastereo-selectivity was conducted in a same manner as previously reported.<sup>[1]</sup> Theoretically, 4 isomers may be formed *via* the double hydrophosphination reaction, and upon addition of a chiral derivatizing agent such as (*S*)-**10**, 3 phosphorous peaks may be observed in the case of a racemic mixture of isomers. However, we only observed the appearance of 1 major signal, indicating the optical purity of the P-H addition reaction. From the above spectra, we are able to calculate the *ee* and *de* of the resulting isomer. Hence we conclude that the *ee* and *de* of ligand **6** to be >99%.

### X-Ray Structures of Clusters 7a-e

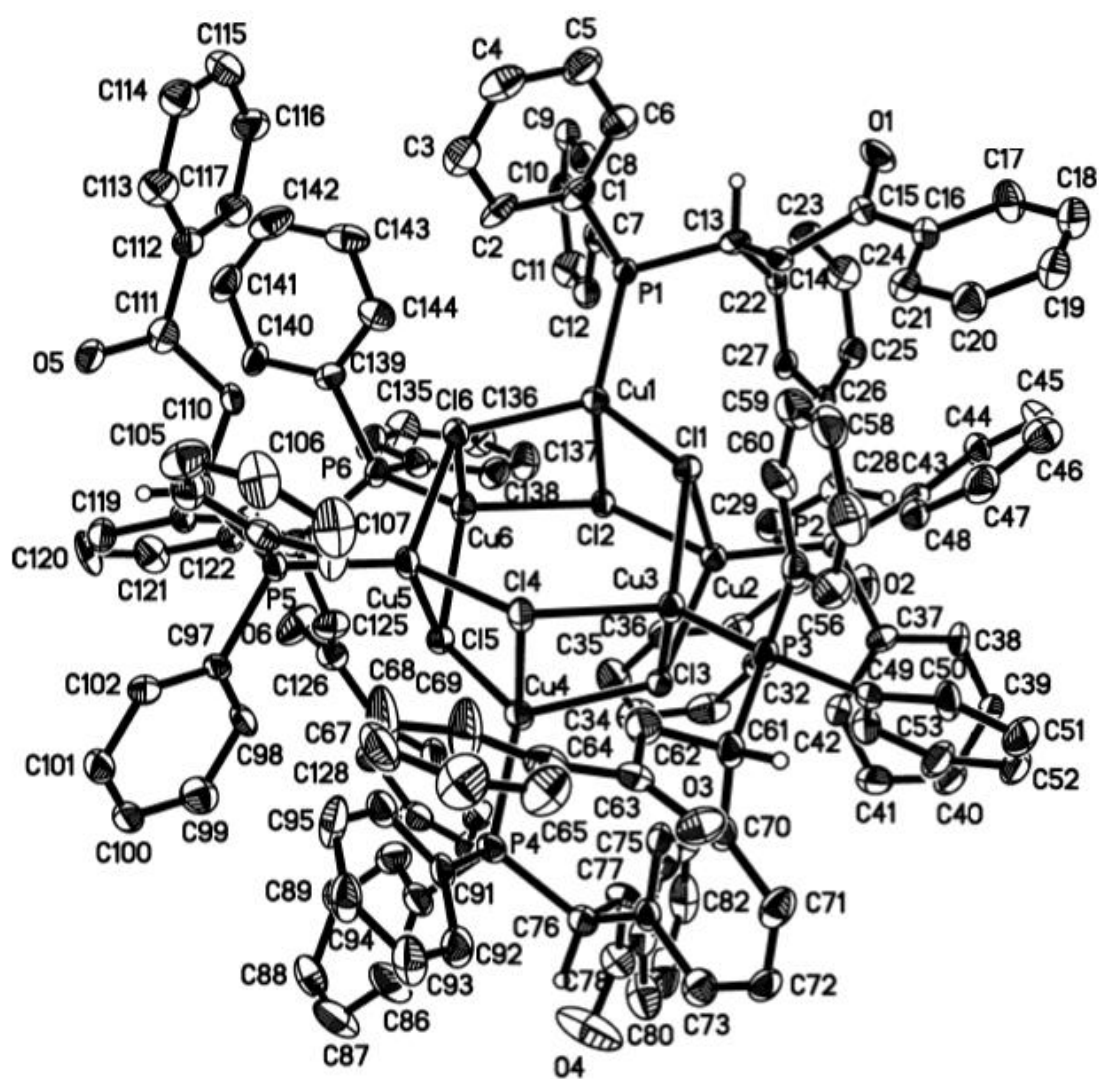

Figure D. X-Ray Structure of Cluster 7a.

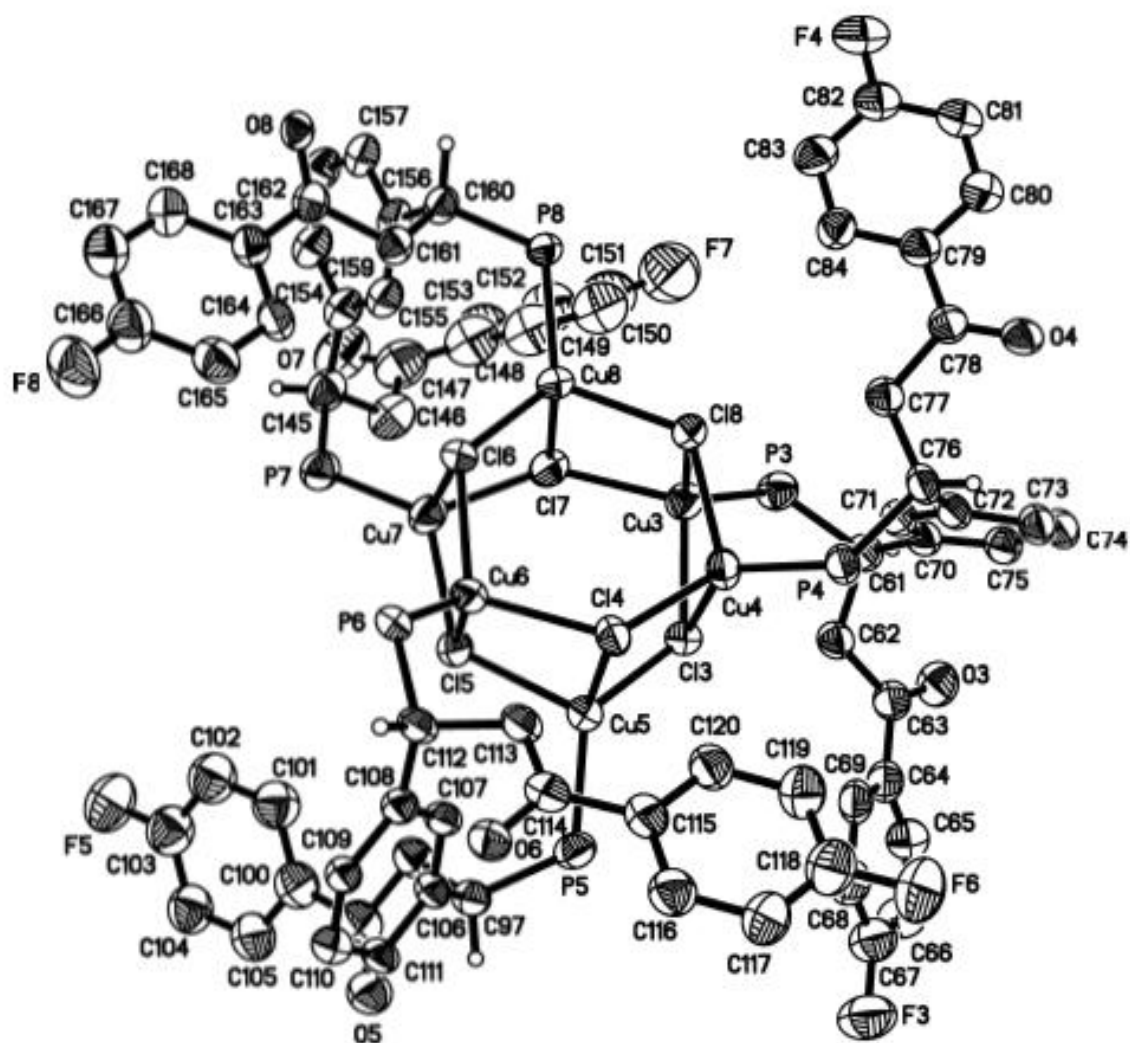

Figure E. X-Ray Structure of Cluster **7b**.

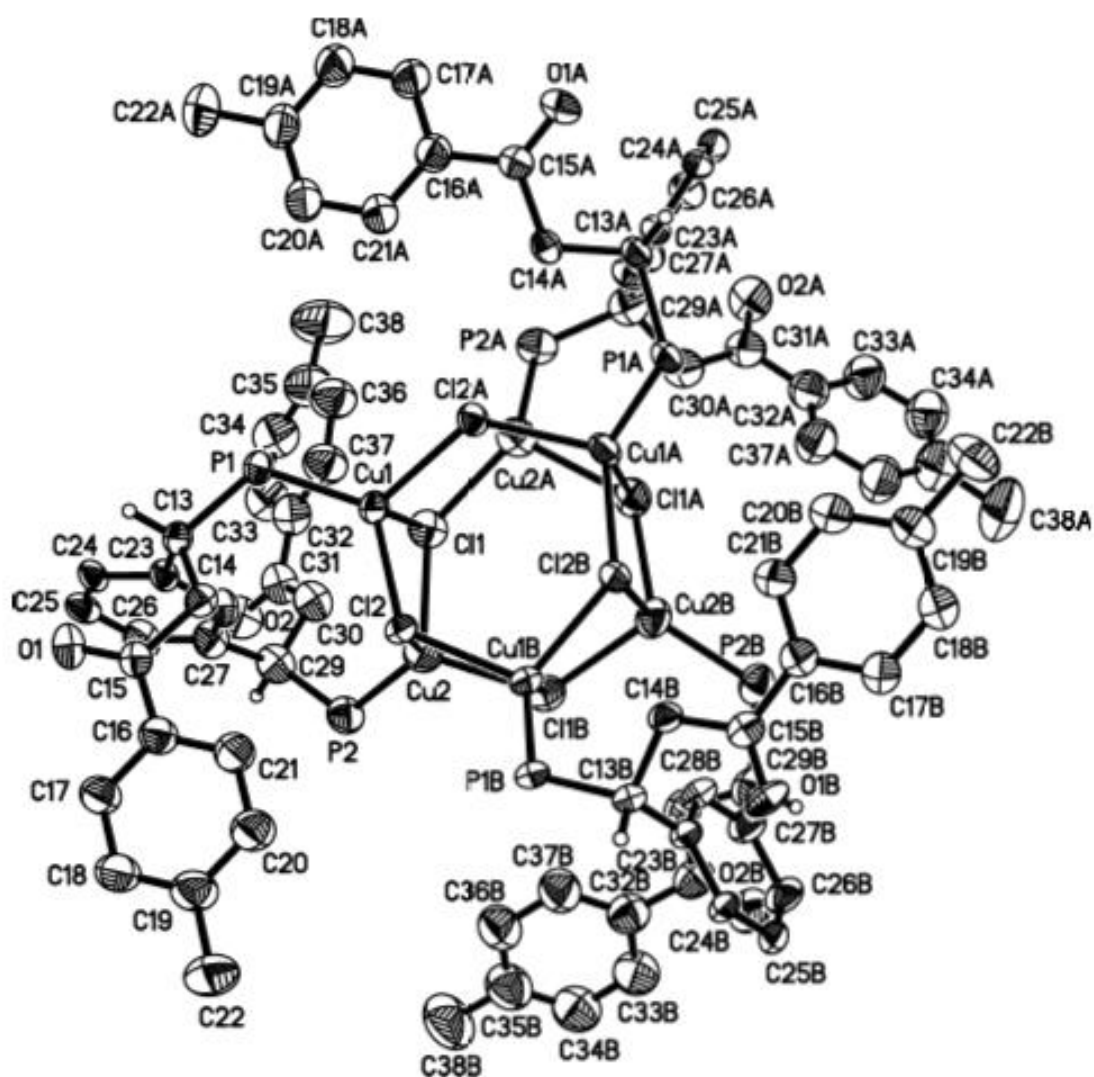

Figure F. X-Ray Structure of Cluster 7c.

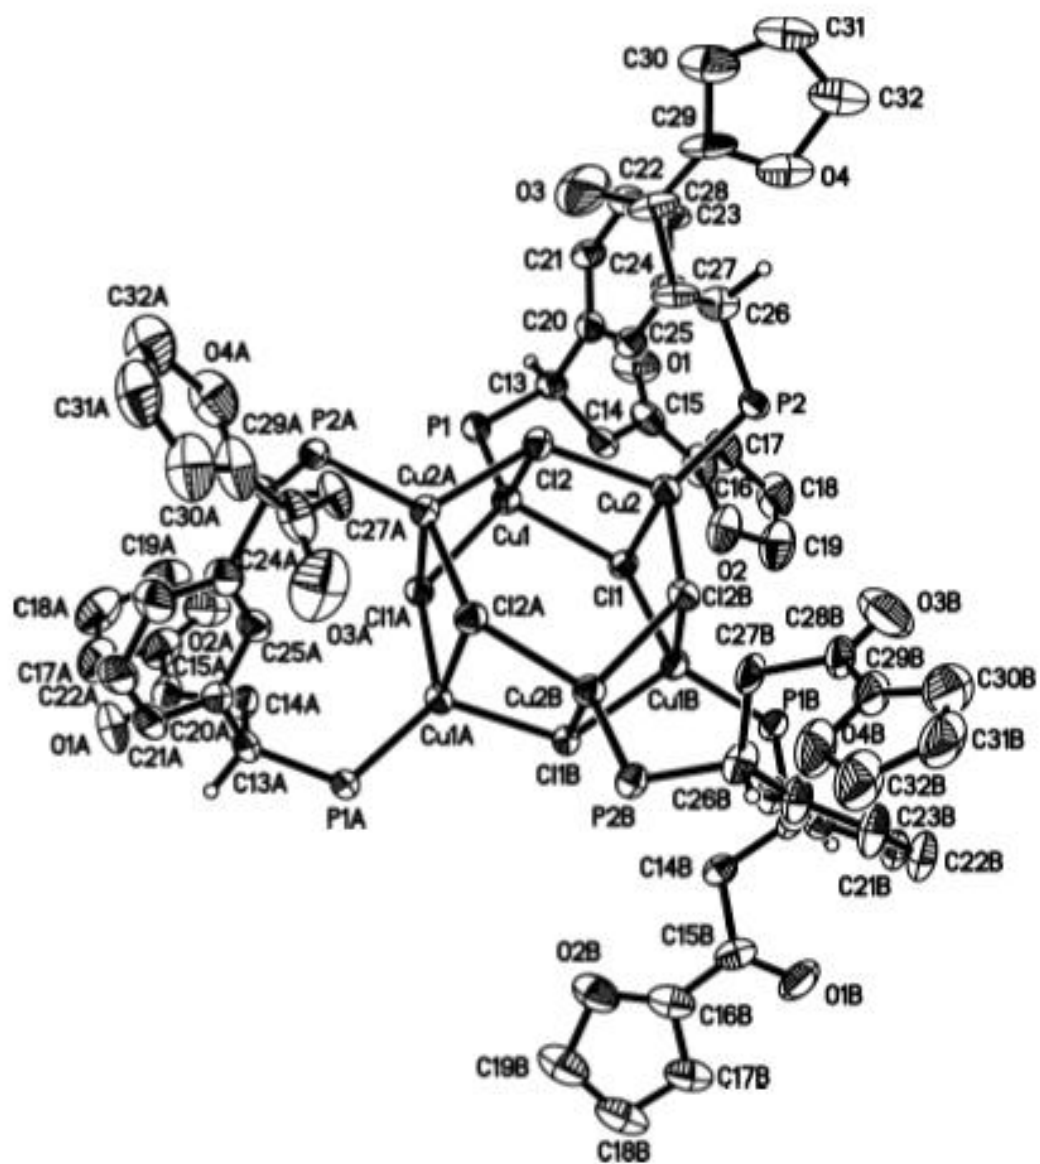

Figure G. X-Ray Structure of Cluster **7d**.



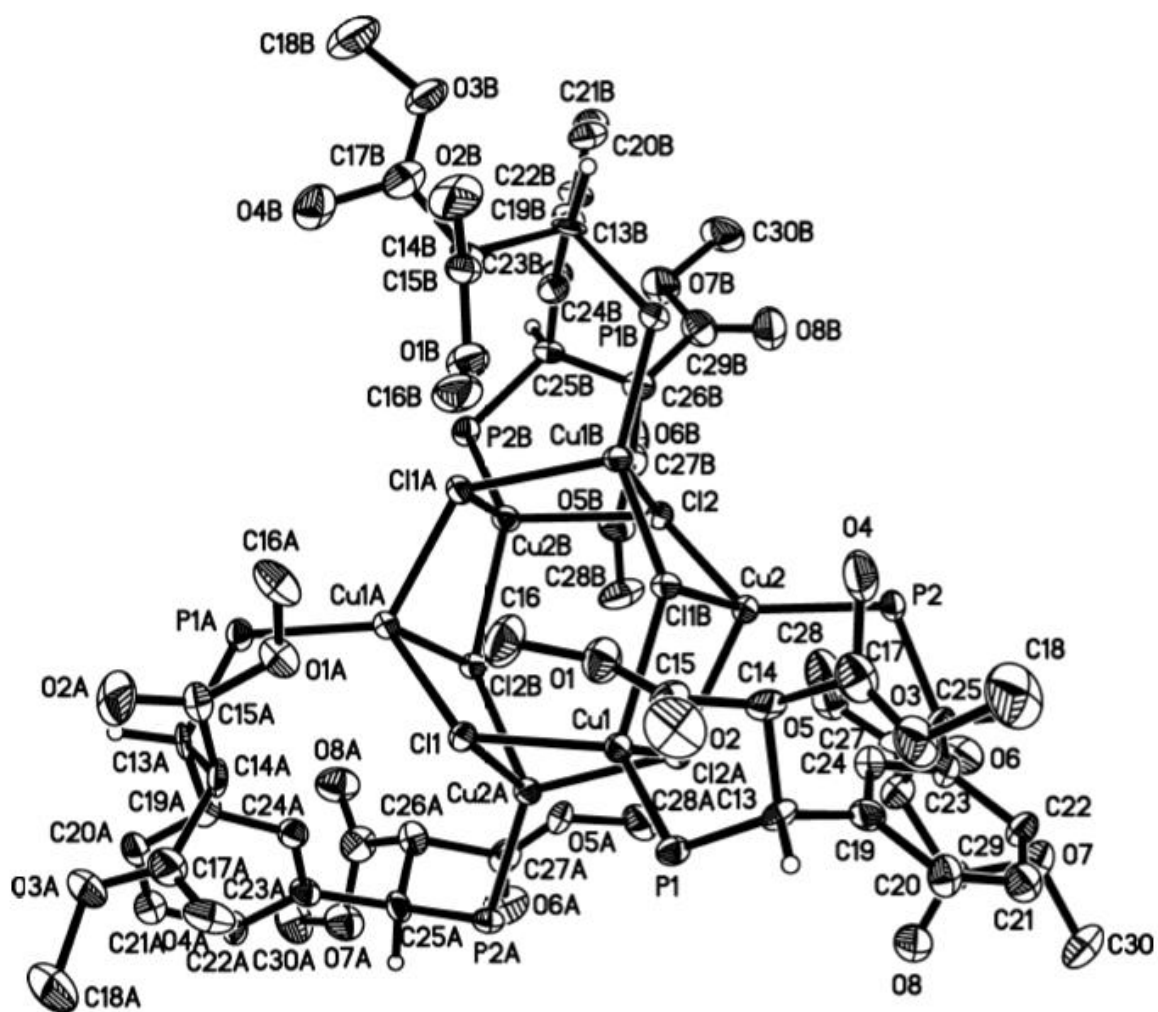

Figure H. X-Ray Structure of Cluster **7e**.

### **Crystallographic Data for Cluster 7a**

|                                   |                                                                                                                                      |
|-----------------------------------|--------------------------------------------------------------------------------------------------------------------------------------|
| Identification code               | leung685                                                                                                                             |
| Empirical formula                 | C150 H132 Cl18 Cu6 O6 P6                                                                                                             |
| Formula weight                    | 3235.72                                                                                                                              |
| Temperature                       | 103(2) K                                                                                                                             |
| Wavelength                        | 0.71073 Å                                                                                                                            |
| Crystal system                    | Monoclinic                                                                                                                           |
| Space group                       | C2                                                                                                                                   |
| Unit cell dimensions              | a = 29.8580(18) Å $\alpha = 90^\circ$ .<br>b = 17.4887(10) Å $\beta = 105.650(2)^\circ$ .<br>c = 28.7963(17) Å $\gamma = 90^\circ$ . |
| Volume                            | 14479.3(15) Å <sup>3</sup>                                                                                                           |
| Z                                 | 4                                                                                                                                    |
| Density (calculated)              | 1.484 Mg/m <sup>3</sup>                                                                                                              |
| Absorption coefficient            | 1.319 mm <sup>-1</sup>                                                                                                               |
| F(000)                            | 6600                                                                                                                                 |
| Crystal size                      | 0.40 x 0.30 x 0.08 mm <sup>3</sup>                                                                                                   |
| Theta range for data collection   | 1.64 to 30.59°.                                                                                                                      |
| Index ranges                      | -40 ≤ h ≤ 42, -25 ≤ k ≤ 16, -41 ≤ l ≤ 34                                                                                             |
| Reflections collected             | 78054                                                                                                                                |
| Independent reflections           | 37663 [R(int) = 0.0739]                                                                                                              |
| Completeness to theta = 30.59°    | 99.1 %                                                                                                                               |
| Absorption correction             | Semi-empirical from equivalents                                                                                                      |
| Max. and min. transmission        | 0.9018 and 0.6205                                                                                                                    |
| Refinement method                 | Full-matrix least-squares on F <sup>2</sup>                                                                                          |
| Data / restraints / parameters    | 37663 / 140 / 1713                                                                                                                   |
| Goodness-of-fit on F <sup>2</sup> | 0.991                                                                                                                                |
| Final R indices [I > 2σ(I)]       | R1 = 0.0672, wR2 = 0.1511                                                                                                            |
| R indices (all data)              | R1 = 0.1405, wR2 = 0.1983                                                                                                            |
| Absolute structure parameter      | -0.005(11)                                                                                                                           |
| Largest diff. peak and hole       | 2.497 and -1.244 e.Å <sup>-3</sup>                                                                                                   |

## **Crystallographic Data for Cluster 7b**

|                                     |                                                                                                                          |                           |
|-------------------------------------|--------------------------------------------------------------------------------------------------------------------------|---------------------------|
| Identification code                 | leung759s                                                                                                                |                           |
| Chemical formula                    | C <sub>144</sub> H <sub>115.25</sub> Cl <sub>17.25</sub> Cu <sub>6</sub> F <sub>6</sub> O <sub>6</sub> P <sub>6</sub>    |                           |
| Formula weight                      | 2887.18                                                                                                                  |                           |
| Temperature                         | 103(2) K                                                                                                                 |                           |
| Wavelength                          | 0.71073 Å                                                                                                                |                           |
| Crystal size                        | 0.340 x 0.380 x 0.400 mm                                                                                                 |                           |
| Crystal habit                       | colorless block                                                                                                          |                           |
| Crystal system                      | trigonal                                                                                                                 |                           |
| Space group                         | R 3                                                                                                                      |                           |
| Unit cell dimensions                | a = 33.8786(6) Å                                                                                                         | $\alpha = 90^\circ$       |
|                                     | b = 33.8786(6) Å                                                                                                         | $\beta = 90^\circ$        |
|                                     | c = 42.7681(9) Å                                                                                                         | $\gamma = 120^\circ$      |
| Volume                              | 42511.0(18) Å <sup>3</sup>                                                                                               |                           |
| Z                                   | 12                                                                                                                       |                           |
| Density (calculated)                | 1.353 g/cm <sup>3</sup>                                                                                                  |                           |
| Absorption coefficient              | 1.149 mm <sup>-1</sup>                                                                                                   |                           |
| F(000)                              | 17667                                                                                                                    |                           |
| Theta range for data collection     | 1.47 to 26.44°                                                                                                           |                           |
| Index ranges                        | -40 ≤ h ≤ 41, -42 ≤ k ≤ 42, -53 ≤ l ≤ 53                                                                                 |                           |
| Reflections collected               | 95011                                                                                                                    |                           |
| Independent reflections             | 38828 [R(int) = 0.0676]                                                                                                  |                           |
| Coverage of independent reflections | 99.7%                                                                                                                    |                           |
| Absorption correction               | multi-scan                                                                                                               |                           |
| Max. and min. transmission          | 0.6960 and 0.6570                                                                                                        |                           |
| Refinement method                   | Full-matrix least-squares on F <sup>2</sup>                                                                              |                           |
| Refinement program                  | SHELXL-2013 (Sheldrick, 2013)                                                                                            |                           |
| Function minimized                  | $\sum w(\text{Fo}^2 - \text{Fc}^2)^2$                                                                                    |                           |
| Data / restraints / parameters      | 38828 / 14440 / 3501                                                                                                     |                           |
| Goodness-of-fit on F <sup>2</sup>   | 1.031                                                                                                                    |                           |
| $\Delta/\sigma_{\text{max}}$        | 0.002                                                                                                                    |                           |
| Final R indices                     | 24942 data; I > 2σ(I)                                                                                                    | R1 = 0.0720, wR2 = 0.1907 |
|                                     | all data                                                                                                                 | R1 = 0.1256, wR2 = 0.2329 |
| Weighting scheme                    | w = 1/[σ <sup>2</sup> (Fo <sup>2</sup> ) + (0.1437P) <sup>2</sup> ]<br>where P = (Fo <sup>2</sup> + 2Fc <sup>2</sup> )/3 |                           |
| Absolute structure parameter        | 0.1(0)                                                                                                                   |                           |
| Largest diff. peak and hole         | 0.943 and -1.270 eÅ <sup>-3</sup>                                                                                        |                           |
| R.M.S. deviation from mean          | 0.216 eÅ <sup>-3</sup>                                                                                                   |                           |

### **Crystallographic Data for Cluster 7c**

|                                     |                                                                                                 |                           |
|-------------------------------------|-------------------------------------------------------------------------------------------------|---------------------------|
| Identification code                 | leung758s_sq_s                                                                                  |                           |
| Chemical formula                    | C <sub>150</sub> H <sub>132</sub> Cl <sub>6</sub> Cu <sub>6</sub> O <sub>6</sub> P <sub>6</sub> |                           |
| Formula weight                      | 2810.31                                                                                         |                           |
| Temperature                         | 103(2) K                                                                                        |                           |
| Wavelength                          | 0.71073 Å                                                                                       |                           |
| Crystal size                        | 0.200 x 0.240 x 0.260 mm                                                                        |                           |
| Crystal habit                       | colorless block                                                                                 |                           |
| Crystal system                      | cubic                                                                                           |                           |
| Space group                         | P 2 3                                                                                           |                           |
| Unit cell dimensions                | a = 24.3499(19) Å                                                                               | $\alpha = 90^\circ$       |
|                                     | b = 24.3499(19) Å                                                                               | $\beta = 90^\circ$        |
|                                     | c = 24.3499(19) Å                                                                               | $\gamma = 90^\circ$       |
| Volume                              | 14437.(3) Å <sup>3</sup>                                                                        |                           |
| Z                                   | 4                                                                                               |                           |
| Density (calculated)                | 1.293 g/cm <sup>3</sup>                                                                         |                           |
| Absorption coefficient              | 1.097 mm <sup>-1</sup>                                                                          |                           |
| F(000)                              | 5784                                                                                            |                           |
| Theta range for data collection     | 1.18 to 25.37°                                                                                  |                           |
| Index ranges                        | -29<=h<=6, -16<=k<=29, -29<=l<=21                                                               |                           |
| Reflections collected               | 33072                                                                                           |                           |
| Independent reflections             | 8840 [R(int) = 0.0788]                                                                          |                           |
| Coverage of independent reflections | 99.7%                                                                                           |                           |
| Absorption correction               | multi-scan                                                                                      |                           |
| Max. and min. transmission          | 0.8100 and 0.7630                                                                               |                           |
| Refinement method                   | Full-matrix least-squares on F <sup>2</sup>                                                     |                           |
| Refinement program                  | SHELXL-2013 (Sheldrick, 2013)                                                                   |                           |
| Function minimized                  | $\sum w(\text{Fo}^2 - \text{Fc}^2)^2$                                                           |                           |
| Data / restraints / parameters      | 8840 / 2970 / 842                                                                               |                           |
| Goodness-of-fit on F <sup>2</sup>   | 1.313                                                                                           |                           |
| $\Delta/\sigma_{\text{max}}$        | 0.001                                                                                           |                           |
| Final R indices                     | 4823 data; $I > 2\sigma(I)$                                                                     | R1 = 0.1173, wR2 = 0.3159 |
|                                     | all data                                                                                        | R1 = 0.2083, wR2 = 0.3854 |
| Weighting scheme                    | $w = 1/[\sigma^2(\text{Fo}^2) + (0.2000P)^2]$<br>where $P = (\text{Fo}^2 + 2\text{Fc}^2)/3$     |                           |
| Absolute structure parameter        | 0.0(0)                                                                                          |                           |
| Largest diff. peak and hole         | 1.094 and -1.032 eÅ <sup>-3</sup>                                                               |                           |
| R.M.S. deviation from mean          | 0.198 eÅ <sup>-3</sup>                                                                          |                           |

## Crystallographic Data for Cluster 7d

|                                   |                                                                                                      |                           |
|-----------------------------------|------------------------------------------------------------------------------------------------------|---------------------------|
| Identification code               | leung748s                                                                                            |                           |
| Chemical formula                  | C <sub>140</sub> H <sub>128.79</sub> Cl <sub>16</sub> Cu <sub>6</sub> O <sub>15</sub> P <sub>6</sub> |                           |
| Formula weight                    | 3185.47                                                                                              |                           |
| Temperature                       | 103(2) K                                                                                             |                           |
| Wavelength                        | 0.71073 Å                                                                                            |                           |
| Crystal size                      | 0.300 x 0.380 x 0.400 mm                                                                             |                           |
| Crystal system                    | trigonal                                                                                             |                           |
| Space group                       | R 3                                                                                                  |                           |
| Unit cell dimensions              | a = 17.3752(10) Å                                                                                    | $\alpha = 90^\circ$       |
|                                   | b = 17.3752(10) Å                                                                                    | $\beta = 90^\circ$        |
|                                   | c = 40.085(2) Å                                                                                      | $\gamma = 120^\circ$      |
| Volume                            | 10480.3(14) Å <sup>3</sup>                                                                           |                           |
| Z                                 | 3                                                                                                    |                           |
| Density (calculated)              | 1.514 g/cm <sup>3</sup>                                                                              |                           |
| Absorption coefficient            | 1.333 mm <sup>-1</sup>                                                                               |                           |
| F(000)                            | 4874                                                                                                 |                           |
| Theta range for data collection   | 2.80 to 31.00°                                                                                       |                           |
| Index ranges                      | -24 ≤ h ≤ 23, -21 ≤ k ≤ 25, -58 ≤ l ≤ 58                                                             |                           |
| Reflections collected             | 45537                                                                                                |                           |
| Independent reflections           | 14843 [R(int) = 0.0684]                                                                              |                           |
| Max. and min. transmission        | 0.6910 and 0.6180                                                                                    |                           |
| Refinement method                 | Full-matrix least-squares on F <sup>2</sup>                                                          |                           |
| Refinement program                | SHELXL-2013 (Sheldrick, 2013)                                                                        |                           |
| Function minimized                | $\sum w(F_o^2 - F_c^2)^2$                                                                            |                           |
| Data / restraints / parameters    | 14843 / 687 / 722                                                                                    |                           |
| Goodness-of-fit on F <sup>2</sup> | 1.007                                                                                                |                           |
| $\Delta/\sigma_{\max}$            | 0.003                                                                                                |                           |
| Final R indices                   | 9863 data; I > 2σ(I)                                                                                 | R1 = 0.0686, wR2 = 0.1828 |
|                                   | all data                                                                                             | R1 = 0.1080, wR2 = 0.2106 |
| Weighting scheme                  | $w = 1/[\sigma^2(F_o^2) + (0.1211P)^2]$<br>where $P = (F_o^2 + 2F_c^2)/3$                            |                           |
| Absolute structure parameter      | 0.0(0)                                                                                               |                           |
| Largest diff. peak and hole       | 1.287 and -0.992 eÅ <sup>-3</sup>                                                                    |                           |
| R.M.S. deviation from mean        | 0.121 eÅ <sup>-3</sup>                                                                               |                           |

## **Crystallographic Data for Cluster 7e**

|                                     |                                                                                                                                                                       |                           |
|-------------------------------------|-----------------------------------------------------------------------------------------------------------------------------------------------------------------------|---------------------------|
| Identification code                 | leung715s                                                                                                                                                             |                           |
| Chemical formula                    | C <sub>142</sub> H <sub>152</sub> Cl <sub>38</sub> Cu <sub>6</sub> O <sub>24</sub> P <sub>6</sub>                                                                     |                           |
| Formula weight                      | 4156.80                                                                                                                                                               |                           |
| Temperature                         | 153(2) K                                                                                                                                                              |                           |
| Wavelength                          | 0.71073 Å                                                                                                                                                             |                           |
| Crystal size                        | 0.180 x 0.220 x 0.300 mm                                                                                                                                              |                           |
| Crystal habit                       | colorless block                                                                                                                                                       |                           |
| Crystal system                      | trigonal                                                                                                                                                              |                           |
| Space group                         | R 3                                                                                                                                                                   |                           |
| Unit cell dimensions                | a = 29.118(3) Å                                                                                                                                                       | $\alpha = 90^\circ$       |
|                                     | b = 29.118(3) Å                                                                                                                                                       | $\beta = 90^\circ$        |
|                                     | c = 16.8751(14) Å                                                                                                                                                     | $\gamma = 120^\circ$      |
| Volume                              | 12390.8(18) Å <sup>3</sup>                                                                                                                                            |                           |
| Z                                   | 3                                                                                                                                                                     |                           |
| Density (calculated)                | 1.671 g/cm <sup>3</sup>                                                                                                                                               |                           |
| Absorption coefficient              | 1.497 mm <sup>-1</sup>                                                                                                                                                |                           |
| F(000)                              | 6318                                                                                                                                                                  |                           |
| Theta range for data collection     | 1.40 to 29.68°                                                                                                                                                        |                           |
| Index ranges                        | -40 ≤ h ≤ 40, -40 ≤ k ≤ 40, -22 ≤ l ≤ 23                                                                                                                              |                           |
| Reflections collected               | 77824                                                                                                                                                                 |                           |
| Independent reflections             | 15493 [R(int) = 0.1246]                                                                                                                                               |                           |
| Coverage of independent reflections | 99.7%                                                                                                                                                                 |                           |
| Absorption correction               | multi-scan                                                                                                                                                            |                           |
| Max. and min. transmission          | 0.7744 and 0.6623                                                                                                                                                     |                           |
| Structure solution technique        | direct methods                                                                                                                                                        |                           |
| Structure solution program          | SHELXS-97 (Sheldrick, 2008)                                                                                                                                           |                           |
| Refinement method                   | Full-matrix least-squares on F <sup>2</sup>                                                                                                                           |                           |
| Refinement program                  | SHELXL-97 (Sheldrick, 2008)                                                                                                                                           |                           |
| Function minimized                  | $\sum w(F_o^2 - F_c^2)^2$                                                                                                                                             |                           |
| Data / restraints / parameters      | 15493 / 2470 / 836                                                                                                                                                    |                           |
| Goodness-of-fit on F <sup>2</sup>   | 0.951                                                                                                                                                                 |                           |
| $\Delta/\sigma_{\max}$              | 0.001                                                                                                                                                                 |                           |
| Final R indices                     | 8256 data; I > 2σ(I)                                                                                                                                                  | R1 = 0.0826, wR2 = 0.2082 |
|                                     | all data                                                                                                                                                              | R1 = 0.1317, wR2 = 0.2272 |
| Weighting scheme                    | w = 1/[σ <sup>2</sup> (F <sub>o</sub> <sup>2</sup> ) + (0.1236P) <sup>2</sup> + 0.0000P]<br>where P = (F <sub>o</sub> <sup>2</sup> + 2F <sub>c</sub> <sup>2</sup> )/3 |                           |
| Absolute structure parameter        | 0.1(0)                                                                                                                                                                |                           |
| Largest diff. peak and hole         | 0.645 and -1.841 eÅ <sup>-3</sup>                                                                                                                                     |                           |
| R.M.S. deviation from mean          | 0.169 eÅ <sup>-3</sup>                                                                                                                                                |                           |

## **Crystallographic Data for Cluster 9**

|                                   |                                                                                                                                                                          |
|-----------------------------------|--------------------------------------------------------------------------------------------------------------------------------------------------------------------------|
| Identification code               | leung690s                                                                                                                                                                |
| Empirical formula                 | C <sub>96</sub> H <sub>80</sub> Cl <sub>4</sub> Cu <sub>4</sub> O <sub>4</sub> P <sub>4</sub>                                                                            |
| Formula weight                    | 1817.44                                                                                                                                                                  |
| Temperature                       | 103(2) K                                                                                                                                                                 |
| Wavelength                        | 0.71073 Å                                                                                                                                                                |
| Crystal system                    | Triclinic                                                                                                                                                                |
| Space group                       | P-1                                                                                                                                                                      |
| Unit cell dimensions              | a = 12.6496(9) Å                      α = 64.969(3)°.<br>b = 13.5286(9) Å                      β = 80.065(4)°.<br>c = 14.9416(10) Å                      γ = 62.687(4)°. |
| Volume                            | 2057.8(2) Å <sup>3</sup>                                                                                                                                                 |
| Z                                 | 1                                                                                                                                                                        |
| Density (calculated)              | 1.467 Mg/m <sup>3</sup>                                                                                                                                                  |
| Absorption coefficient            | 1.281 mm <sup>-1</sup>                                                                                                                                                   |
| F(000)                            | 932                                                                                                                                                                      |
| Crystal size                      | 0.24 x 0.10 x 0.08 mm <sup>3</sup>                                                                                                                                       |
| Theta range for data collection   | 1.50 to 25.07°.                                                                                                                                                          |
| Index ranges                      | -15 ≤ h ≤ 15, -16 ≤ k ≤ 16, -17 ≤ l ≤ 17                                                                                                                                 |
| Reflections collected             | 31644                                                                                                                                                                    |
| Independent reflections           | 7233 [R(int) = 0.0540]                                                                                                                                                   |
| Completeness to theta = 25.07°    | 99.1 %                                                                                                                                                                   |
| Absorption correction             | Semi-empirical from equivalents                                                                                                                                          |
| Max. and min. transmission        | 0.9045 and 0.7486                                                                                                                                                        |
| Refinement method                 | Full-matrix least-squares on F <sup>2</sup>                                                                                                                              |
| Data / restraints / parameters    | 7233 / 0 / 505                                                                                                                                                           |
| Goodness-of-fit on F <sup>2</sup> | 1.111                                                                                                                                                                    |
| Final R indices [I > 2σ(I)]       | R1 = 0.0583, wR2 = 0.1620                                                                                                                                                |
| R indices (all data)              | R1 = 0.0846, wR2 = 0.1949                                                                                                                                                |
| Largest diff. peak and hole       | 2.903 and -1.073 e.Å <sup>-3</sup>                                                                                                                                       |
